# Supplementary material for: Enantioselective construction of multifunctionalized spirocyclohexaneoxindoles through organocatalytic Michael–Aldol cyclization of isatin derived alkenes with linear dialdehydes
Source: Royal Society of Chemistry journal article supplement (doi:10.1039/c2ob26205c), 2012-01-01
Supplement: c2ob26205c.pdf [file c2ob26205c.pdf]

**Supporting Information**  
**Enantioselective Construction of Multifunctionalized**  
**Spirocyclohexaneoxindoles through Organocatalytic**  
**Michael-Aldol Cyclization of Isatin Derived Alkenes with**  
**Linear Dialdehydes**

Xiao-Fei Huang, Zhao-Min Liu, Zhi-Cong Geng, Shao-Yun Zhang, Yong

Wang\* and Xing-Wang Wang\*

*Key Laboratory of Organic Synthesis of Jiangsu Province, College of Chemistry,  
Chemical Engineering and Materials Science, Soochow University, Suzhou 215123,  
People's Republic of China*

Fax: +(86)512-6588-0378

E-mail: [wangxw@suda.edu.cn](mailto:wangxw@suda.edu.cn)

|                                                                       |           |
|-----------------------------------------------------------------------|-----------|
| <b>A: General Information</b>                                         | <b>2</b>  |
| <b>B: General Procedure for the Michael-Aldol Cyclization</b>         | <b>3</b>  |
| <b>C: Characterization Data of Michael-Aldol Cyclization Products</b> | <b>3</b>  |
| <b>D: X-ray crystal structure of <i>ent</i>-3e</b>                    | <b>12</b> |
| <b>E: References</b>                                                  | <b>12</b> |
| <b>F: NMR Analysis of Michael-Aldol Cyclization Products</b>          | <b>14</b> |
| <b>G: HPLC Analysis of Michael-Aldol Cyclization Products</b>         | <b>31</b> |

### A: General Information:

Unless otherwise stated, all reagents were purchased from commercial suppliers and used without further purification. All reactions were carried out in air and using undistilled solvent, without any precautions to exclude moisture unless otherwise noted. Organic solutions were concentrated under reduced pressure on an EYELA N-1001 rotary evaporator. Reactions were monitored by thin-layer chromatography (TLC) on silica gel precoated glass plates (0.2±0.03 mm thickness, GF-254, particle size 0.01–0.04 mm) from Yantai Chemical Industry Research Institute, P. R. China. Chromatograms were visualized by fluorescence quenching with UV light at 254 nm. Flash column chromatography was performed using silica gel (particle size 0.04–0.05 mm) from Yantai Chemical Industry Research Institute, P. R. China. <sup>1</sup>H (400 MHz) and <sup>13</sup>C (100 MHz) NMR spectra were recorded in CDCl<sub>3</sub> on Varian Inova-400 NMR spectrometer. Chemical shifts (δ ppm) were relative to the resonance of the deuterated solvent as the internal standard (CDCl<sub>3</sub>, δ 7.26 ppm for proton NMR, δ 77.00 ppm for carbon NMR). Melting points were measured on an X-5 melting point apparatus and uncorrected. <sup>1</sup>H NMR data were reported as follows: chemical shift (δ, ppm), multiplicity (s = singlet, d = doublet, q = quartet, m = multiplet), coupling constants (J) and assignment. Data for <sup>13</sup>C NMR were reported in terms of chemical shift (δ, ppm). Mass spectra were carried out using Agilent 6120 Quadrupole LC/MS system with ESI resource. High-resolution mass spectra (HRMS) for all the compounds were determined on Micromass GCT-TOF mass spectrometer with ESI resource. High performance liquid chromatography (HPLC) was performed on an Agilent 1200 Series chromatographs using a Chiralcel AS-H column (0.46cm x 25 cm), Chiralpak AD-H (0.46cm x 25 cm). X-ray data were recorded on a Rigaku Mercury CCD/AFC diffractometer. Optical rotations are reported as follows: [α]<sub>D</sub><sup>rt</sup> (c in g per 100 mL, solvent). ECD spectra were recorded on a circular dichroism spectrometer model 410 at 25°C in ethanol solutions, using path lengths of 1.0 cm, in the range 220–300 nm; reported Δε values are expressed as L mol<sup>-1</sup>cm<sup>-1</sup>. DFT Calculations were used Gaussian 03, Revision B.04.

The Isatin Derived Alkenes were prepared according to reported methods.<sup>1-2</sup>

## B: General Procedure for the Michael-Aldol Cyclization

To a stirred solution of 1a-r (0.2 mmol) and I or II (0.02 mmol) in dichloromethane (1.0 mL) was added tetrahydro-2H-pyran-2,6-diol (50% in solution, 91  $\mu$ L, 0.5 mmol) at room temperature. After being stirred for the given time, the desired domino Michael-Aldol cyclization product was purified by flash chromatography over silica gel (petroleum ether/ethyl acetate = 2:1-4:1, v/v as eluent)

## C: Characterization Data of Domino Michael-Aldol Cyclization Products

**benzyl-2,2-diethyl-3-formyl-6-hydroxy-2'-oxospiro[cyclohexane-1,3'-indoline]-1', 2,2-tricarboxylate (3d):** yellow oil, 72% yield, 95% ee. The enantiomeric excess was determined by HPLC on Daicel Chiralpak AD-H with hexane/i-PrOH (80:20) as the

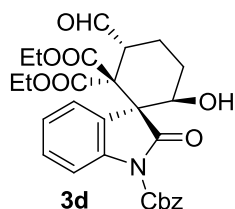

eluent. Flow: 1.0 mL/min;  $\lambda = 210$  nm:  $t_{\text{minor}} = 15.462$  min;  $t_{\text{major}} = 26.119$  min.  $[\alpha]_{\text{D}}^{20} -24.1$  (c 0.50 in  $\text{CH}_3\text{COCH}_3$ ).  $^1\text{H}$  NMR (400 MHz,  $\text{CDCl}_3$ )  $\delta$  9.78 (s, 1H), 7.92 (d,  $J = 8.0$  Hz, 1H), 7.48 (d,  $J = 7.2$  Hz, 2H), 7.40 - 7.32 (m, 4H), 7.24 (d,  $J = 7.6$  Hz, 1H), 7.15 (t,  $J = 7.6$  Hz, 1H), 5.46 (d,  $J = 12.4$  Hz, 1H), 5.37 (d,  $J = 12.4$  Hz, 1H), 4.64 (dd,  $J = 11.5, 4.6$  Hz, 1H), 4.30 - 4.23 (m, 2H), 4.07 - 4.03 (m, 1H), 3.89 - 3.84 (m, 2H), 2.28 - 2.21 (m, 1H), 2.11 - 2.07 (m, 2H), 2.02 - 1.98 (m, 1H), 1.67 (s, 1H), 1.21 (t,  $J = 7.2$  Hz, 3H), 0.82 (t,  $J = 6.8$  Hz, 3H).  $^{13}\text{C}$  NMR (101 MHz,  $\text{CDCl}_3$ )  $\delta$  199.86, 174.10, 168.56, 167.96, 150.40, 141.17, 134.86, 128.81, 128.76, 128.53, 128.35, 128.02, 124.58, 122.87, 114.67, 73.12, 68.53, 62.15, 62.07, 61.64, 56.66, 49.60, 26.48, 21.06, 13.64, 13.01. ESI-MS:  $[\text{M} + \text{Na}]^+$   $m/z = 546.2$ ; HRMS:  $m/z$   $[\text{M} + \text{H}]^+$  calcd for  $\text{C}_{28}\text{H}_{30}\text{NO}_9$ : 524.1915; found: 524.1937.

**1'-tert-butyl-2,2-diethyl-3-formyl-6-hydroxy-2'-oxospiro[cyclohexane-1,3'-indoline]-1',2,2-tricarboxylate (3e):** White solid; m.p. 131-132  $^\circ\text{C}$ ; 86% yield, >99% ee.

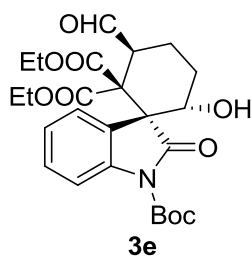

The enantiomeric excess was determined by HPLC on Daicel Chiralpak AS-H with hexane/i-PrOH (92:8) as the eluent. Flow: 1.0 mL/min;  $\lambda = 210$  nm:  $t_{\text{minor}} = 11.878$  min;  $t_{\text{major}} = 13.377$  min.  $[\alpha]_{\text{D}}^{10} +19.8$  (c 0.85 in  $\text{CH}_3\text{COCH}_3$ ).  $^1\text{H}$  NMR (400 MHz,  $\text{CDCl}_3$ )  $\delta$  9.71 (s, 1H), 7.78 (d,  $J = 8.0$  Hz, 1H), 7.26 (t,  $J = 7.6$  Hz, 1H), 7.17 (d,  $J = 7.6$  Hz, 1H), 7.06 (t,  $J = 7.6$  Hz, 1H), 4.53 (d,  $J = 10.4$  Hz, 1H),

4.20 (q,  $J = 3.2$  Hz, 2H), 4.06 - 3.96 (m, 1H), 3.92 - 3.80 (m, 2H), 2.23 - 2.13 (m, 1H), 2.01 (s, 1H), 1.95 - 1.88 (m, 3H), 1.56 (s, 9H), 1.16 (t,  $J = 6.8$  Hz, 3H), 0.87 (t,  $J = 6.8$  Hz, 3H).  $^{13}\text{C}$  NMR (100 MHz,  $\text{CDCl}_3$ )  $\delta$  199.93, 173.99, 168.46, 167.85, 148.71, 141.48, 128.62, 128.46, 124.03, 122.77, 114.31, 84.12, 72.83, 61.85, 61.51, 56.40, 49.41, 27.85, 26.36, 20.88, 13.52, 12.94. ESI-MS:  $[\text{M} + \text{Na}]^+$   $m/z = 512.2$ ; HRMS:  $m/z$   $[\text{M} + \text{Na}]^+$  calcd for  $\text{C}_{25}\text{H}_{31}\text{NNaO}_9$ : 512.1891; found: 512.1877.

**tert-butyl-3-formyl-6-hydroxy-2'-oxo-2-phenylspiro[cyclohexane-1,3'-indoline]-1'-carboxylate.** The reaction was carried out following the general procedure using **II** as catalyst to furnish the crude product **3f**: White solid; m.p. 112-113 °C; 52% yield,

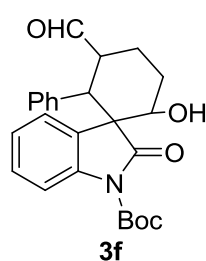

94.5% ee. The enantiomeric excess was determined by HPLC on Daicel Chiralpak OD-H with hexane/*i*-PrOH (90:10) as the eluent. Flow: 1 mL/min;  $\lambda = 210$  nm:  $t_{\text{minor}} = 10.458$  min;  $t_{\text{major}} = 12.154$  min.  $[\alpha]_{\text{D}}^{10} +4.6$  (c 0.50 in  $\text{CH}_3\text{COCH}_3$ ).

The reaction was carried out following the general procedure using **I** as catalyst to furnish the crude product *ent*-**3f**: 48% yield, -99% ee. The enantiomeric excess was determined by HPLC on Daicel Chiralpak OD-H with hexane/*i*-PrOH (90:10) as the eluent. Flow: 1 mL/min;  $\lambda = 210$  nm:  $t_{\text{minor}} = 12.271$  min;  $t_{\text{major}} = 10.708$  min.  $^1\text{H}$  NMR (400 MHz,  $\text{CDCl}_3$ )  $\delta$  9.78 (s, 1H), 7.66 (d,  $J = 6.4$  Hz, 1H), 7.24 (s, 1H), 7.17 (d,  $J = 7.6$  Hz, 1H), 7.10 (d,  $J = 6.8$  Hz, 2H), 7.05 (t,  $J = 7.2$ , 3H), 6.99 (t,  $J = 7.2$  Hz, 1H), 4.15 (d,  $J = 5.6$  Hz, 1H), 3.71 (s, 1H), 2.64 (s, 1H), 2.42 (d,  $J = 15.2$  Hz, 1H), 2.34 (d,  $J = 14$  Hz, 1H), 2.22 (s, 1H), 2.12 (d,  $J = 12.8$  Hz, 1H), 1.73 (d,  $J = 12$  Hz, 1H), 1.63 (s, 9H).  $^{13}\text{C}$  NMR (100 MHz,  $\text{CDCl}_3$ )  $\delta$  201.18, 176.75, 148.84, 138.79, 138.10, 129.14, 128.60, 128.43, 126.99, 124.47, 124.10, 114.74, 84.87, 69.65, 55.65, 50.38, 45.04, 28.05, 23.92, 18.40. ESI-MS:  $[\text{M} + \text{Na}]^+$   $m/z = 444.2$ ; HRMS:  $m/z$   $[\text{M} + \text{Na}]^+$  calcd for  $\text{C}_{25}\text{H}_{27}\text{NaNO}_5$ : 444.1781; found: 444.1784.

**1'-tert-butyl-2-ethyl-3-formyl-6-hydroxy-2'-oxospiro[cyclohexane-1,3'-indoline]-1',2-dicarboxylate.** The reaction was carried out following the general procedure using **II** as catalyst to furnish the crude product **3g**: White solid; m.p. 53-54 °C; 54% yield, >99% ee. The enantiomeric excess was determined by HPLC on Daicel

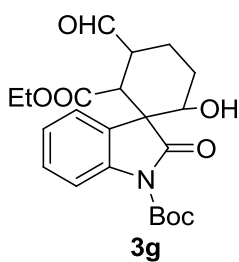

Chiralpak OD-H with hexane/*i*-PrOH (90:10) as the eluent. Flow: 1 mL/min;  $\lambda = 210$  nm:  $t_{\text{minor}} = 15.597$  min;  $t_{\text{major}} = 12.186$  min.  $[\alpha]_{\text{D}}^{10} +4.1$  (c 0.25 in  $\text{CH}_3\text{COCH}_3$ ).

The reaction was carried out following the general procedure using **I** as catalyst to furnish the crude product *ent*-**3en**: 51% yield, -95.7% ee. The enantiomeric excess was determined by HPLC on Daicel Chiralpak OD-H with hexane/*i*-PrOH (90:10) as the eluent. Flow: 1 mL/min;  $\lambda = 210$  nm:  $t_{\text{minor}} = 11.829$  min;  $t_{\text{major}} = 14.982$  min.  $^1\text{H}$  NMR (400 MHz,  $\text{CDCl}_3$ )  $\delta$  9.61 (s, 1H), 7.81 (d,  $J = 8.0$  Hz, 1H), 7.33 - 7.27 (m, 2H), 7.12 (t,  $J = 7.2$  Hz, 1H), 4.01 - 3.91 (m, 2H), 3.69 (s, 1H), 3.66 (d,  $J = 6.0$  Hz, 1H), 2.93 - 2.92 (m, 1H), 2.41 (dd,  $J = 10.0, 3.6$  Hz, 1H), 2.21 (t,  $J = 13.2$  Hz, 1H), 2.09 - 2.05 (m, 1H), 2.00 (s, 1H), 1.69 (dd,  $J = 10.4, 3.6$  Hz, 1H), 1.59 (s, 9H), 1.03 (t,  $J = 7.2$ , 3H).  $^{13}\text{C}$  NMR (100 MHz,  $\text{CDCl}_3$ )  $\delta$  199.34, 175.56, 170.85, 148.90, 139.69, 129.71, 128.78, 123.98, 123.44, 115.14, 84.51, 68.57, 61.27, 52.73, 46.21, 44.66, 28.05, 17.41, 13.66. ESI-MS:  $[\text{M} + \text{Na}]^+$   $m/z = 440.2$ ; HRMS:  $m/z$   $[\text{M} + \text{NH}_4]^+$  calcd for  $\text{C}_{22}\text{H}_{31}\text{N}_2\text{O}_7$ : 435.2131; found: 435.2135.

**1'-tert-butyl-2,2-diethyl-3-formyl-6-hydroxy-5'-methyl-2'-oxospiro[cyclohexane-1,3'-indoline]-1',2,2-tricarboxylate (3h)**: White solid; m.p. 134-135 °C; 84% yield, >99% ee. The enantiomeric excess was determined by HPLC on Daicel

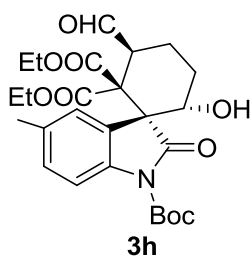

Chiralpak AD-H with hexane/*i*-PrOH (92:8) as the eluent. Flow: 1.0 mL/min;  $\lambda = 210$  nm:  $t_{\text{minor}} = 40.648$  min;  $t_{\text{major}} = 25.100$  min.  $[\alpha]_{\text{D}}^{10} -1.1$  (c 1.00 in  $\text{CH}_3\text{COCH}_3$ ).  $^1\text{H}$  NMR (400 MHz,  $\text{CDCl}_3$ )  $\delta$  9.75 (s, 1H), 7.69 (d,  $J = 8.4$  Hz, 1H), 7.10(d,  $J = 8.4$  Hz, 1H), 7.01 (s, 1H), 4.56 (d,  $J = 3.6$  Hz, 1H), 4.25(q,  $J = 6.8$  Hz, 2H),

4.04 - 3.94 (m, 1H), 3.92 - 3.84 (m, 2H), 2.304 (s, 3H), 2.25 - 2.18 (m, 1H), 2.09 - 2.05 (m, 2H), 1.95 (d,  $J = 9.2$  Hz, 1H), 1.68 (s, 1H), 1.58(s, 9H), 1.21 (t,  $J = 7.2$  Hz, 3H), 0.92 (t,  $J = 6.8$  Hz, 3H).  $^{13}\text{C}$  NMR (100 MHz,  $\text{CDCl}_3$ )  $\delta$  200.25, 174.54, 168.88, 168.36, 149.13, 139.49, 133.96, 129.37, 128.71, 123.74, 114.57, 84.38, 73.37, 62.28, 62.17, 61.76, 56.76, 49.91, 28.25, 26.66, 21.43, 21.33, 13.95, 13.36. ESI-MS:  $[\text{M} + \text{Na}]^+$   $m/z = 526.2$ ; HRMS:  $m/z$   $[\text{M} + \text{Na}]^+$  calcd for  $\text{C}_{26}\text{H}_{33}\text{NNaO}_9$ : 526.2048; found: 526.2036.

**1'-tert-butyl-2,2-diethyl-3-formyl-6-hydroxy-5'-methoxy-2'-oxospiro[cyclohexane-1,3'-indoline]-1',2,2-tricarboxylate (3i):** White solid; m.p. 61-62 °C; 88% yield, 98.5% ee. The enantiomeric excess was determined by HPLC on Daicel Chiralpak

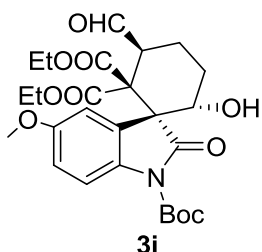

AD-H with hexane/i-PrOH (80:20) as the eluent. Flow: 1.0 mL/min;  $\lambda = 210$  nm:  $t_{\text{minor}} = 24.027$  min;  $t_{\text{major}} = 11.497$  min.

$[\alpha]_{\text{D}}^{10} +6.3$  (c 1.00 in  $\text{CH}_3\text{COCH}_3$ ).  $^1\text{H NMR}$  (400 MHz,  $\text{CDCl}_3$ )  $\delta$  9.75 (s, 1H), 7.73 (d,  $J = 8.4$  Hz, 1H), 6.79 (s, 2H), 4.61 - 4.58 (m, 1H), 4.24 (t,  $J = 6.8$  Hz, 2H), 4.06 - 4.02 (m, 1H), 3.98 - 3.85 (m, 2H), 3.73 (s, 3H), 2.24 - 2.17 (m, 1H), 2.06 - 1.99 (m,

3H), 1.84 (s, 1H), 1.57(s, 9H), 1.21 (t,  $J = 7.2$  Hz, 3H), 0.92 (t,  $J = 6.8$  Hz, 3H).  $^{13}\text{C NMR}$  (100 MHz,  $\text{CDCl}_3$ )  $\delta$  200.01, 174.09, 168.50, 167.94, 156.54, 148.85, 134.92, 129.90, 115.19, 112.61, 109.97, 84.04, 73.05, 62.02, 61.64, 56.70, 55.40, 49.48, 27.96, 26.49, 20.94, 13.60, 13.07. ESI-MS:  $[\text{M} + \text{Na}]^+$   $m/z = 542.2$ ; HRMS:  $m/z$   $[\text{M} + \text{Na}]^+$  calcd for  $\text{C}_{26}\text{H}_{33}\text{NNaO}_{10}$ : 542.1997; found: 542.1980.

**1'-tert-butyl-2,2-diethyl-3-formyl-6-hydroxy-5',7'-dimethyl-2'-oxospiro[cyclohexane-1,3'-indoline]-1',2,2-tricarboxylate (3j):** White solid; m.p. 42-43 °C; 71% yield, 98.4% ee. The enantiomeric excess was determined by HPLC on Daicel Chiralpak

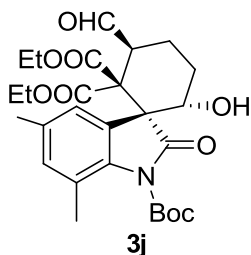

AD-H with hexane/i-PrOH (80:20) as the eluent. Flow: 1.0 mL/min;  $\lambda = 210$  nm:  $t_{\text{minor}} = 9.117$  min;  $t_{\text{major}} = 6.690$  min.

$[\alpha]_{\text{D}}^{10} +28.1$  (c 1.00 in  $\text{CH}_3\text{COCH}_3$ ).  $^1\text{H NMR}$  (400 MHz,  $\text{CDCl}_3$ )  $\delta$  9.79 (s, 1H), 6.95 (s, 1H), 6.90 (s, 1H), 4.60 - 4.58 (m, 1H), 4.27 (t,  $J = 5.2$  Hz, 2H), 4.09 - 4.00 (m, 2H), 3.93 -

3.89 (m, 1H), 2.30 (s, 3H), 2.22 (s, 1H), 2.19 (s, 3H), 2.07 - 2.05 (m, 2H), 1.99 (d,  $J = 9.6$  Hz, 1H), 1.59(s, 9H), 1.23 (t,  $J = 6.8$  Hz, 3H), 0.94 (t,  $J = 6.8$  Hz, 3H).  $^{13}\text{C NMR}$  (100 MHz,  $\text{CDCl}_3$ )  $\delta$  200.16, 175.23, 168.63, 168.10, 148.95, 137.86, 133.74, 132.20, 129.67, 123.10, 121.28, 84.36, 72.90, 62.18, 61.88, 61.56, 57.29, 49.57, 27.75, 26.43, 21.13, 21.02, 19.49, 13.73, 13.15. ESI-MS:  $[\text{M} + \text{Na}]^+$   $m/z = 540.3$ ; HRMS:  $m/z$   $[\text{M} + \text{Na}]^+$  calcd for  $\text{C}_{27}\text{H}_{35}\text{NNaO}_9$ : 540.2204; found: 540.2193.

**1'-tert-butyl-2,2-diethyl-5'-fluoro-3-formyl-6-hydroxy-2'-oxospiro[cyclohexane-1,3'-indoline]-1',2,2-tricarboxylate (3k)** : White solid; m.p. 78-79 °C; 82% yield, 97.6% ee. The enantiomeric excess was determined by HPLC on Daicel Chiralpak

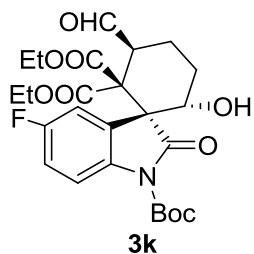

AD-H with hexane/*i*-PrOH (80:20) as the eluent. Flow: 1.0 mL/min;  $\lambda = 210$  nm:  $t_{\text{minor}} = 14.475$  min;  $t_{\text{major}} = 7.007$  min.  $[\alpha]_{\text{D}}^{10} +25.2$  (c 1.00 in  $\text{CH}_3\text{COCH}_3$ ).  $^1\text{H}$  NMR (400 MHz,  $\text{CDCl}_3$ )  $\delta$  9.77 (s, 1H), 7.81 (q,  $J = 4.4$  Hz, 1H), 7.00 - 7.02 (m, 2H), 4.65 - 4.61 (m, 1H), 4.27 (q,  $J = 6.4$  Hz, 2H), 4.10 - 4.03 (m, 1H), 3.99 - 3.88 (m, 2H), 2.26 - 2.22 (m, 1H), 2.07 - 2.06 (m, 1H), 2.03 - 2.00 (m, 2H), 1.93 (s, 1H), 1.59 (s, 9H), 1.22 (t,  $J = 6.8$  Hz, 3H), 0.93 (t,  $J = 6.8$  Hz, 3H).  $^{13}\text{C}$  NMR (100MHz,  $\text{CDCl}_3$ )  $\delta$  200.15, 174.08, 168.62, 168.12, 161.13, 158.72, 149.02, 137.83, 131.05, 130.97, 115.84, 115.76, 115.21, 114.98, 111.34, 111.09, 84.77, 73.22, 62.49, 62.42, 61.93, 57.00, 49.64, 28.21, 27.00, 21.12, 13.89, 13.36. ESI-MS:  $[\text{M} + \text{Na}]^+$   $m/z = 530.2$ ; HRMS:  $m/z$   $[\text{M} + \text{Na}]^+$  calcd for  $\text{C}_{25}\text{H}_{30}\text{FNaNO}_9$ : 530.1797; found: 530.1799.

**1'-tert-butyl-2,2-diethyl-5'-chloro-3-formyl-6-hydroxy-2'-oxospiro[cyclohexane-1,3'-indoline]-1',2,2-tricarboxylate (3l)** : White solid; m.p. 131-135 °C; 79% yield, 97.4% ee. The enantiomeric excess was determined by HPLC on Daicel Chiralpak

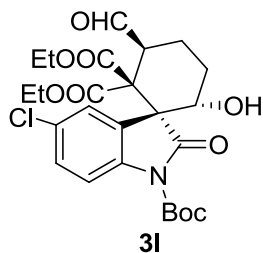

AD-H with hexane/*i*-PrOH (80:20) as the eluent. Flow: 1.0 mL/min;  $\lambda = 210$  nm:  $t_{\text{minor}} = 14.732$  min;  $t_{\text{major}} = 8.859$  min.  $[\alpha]_{\text{D}}^{10} -14.3$  (c 0.80 in  $\text{CH}_3\text{COCH}_3$ ).  $^1\text{H}$  NMR (400 MHz,  $\text{CDCl}_3$ )  $\delta$  9.74 (s, 1H), 7.76 (d,  $J = 8.4$  Hz, 1H), 7.28 (d,  $J = 4.4$  Hz, 1H), 7.2 (s, 1H), 4.59 - 4.56 (m, 1H), 4.32 - 4.22 (m, 2H), 4.01 - 3.93 (m, 2H), 3.92 - 3.87 (m, 1H), 2.27 - 2.16 (m, 1H), 2.07 - 2.05 (m, 2H), 1.99 - 1.94 (m, 1H), 1.85 (s, 1H), 1.58 (s, 9H), 1.22 (t,  $J = 6.8$  Hz, 3H), 0.93 (t,  $J = 6.8$  Hz, 3H).  $^{13}\text{C}$  NMR (100 MHz,  $\text{CDCl}_3$ )  $\delta$  199.71, 173.59, 168.38, 167.92, 148.64, 140.17, 130.69, 129.60, 128.47, 123.32, 115.62, 84.65, 73.02, 62.26, 62.19, 61.48, 56.53, 49.49, 27.94, 26.66, 20.96, 13.69, 13.12. ESI-MS:  $[\text{M} + \text{Na}]^+$   $m/z = 546.2$ ; HRMS:  $m/z$   $[\text{M} + \text{Na}]^+$  calcd for  $\text{C}_{25}\text{H}_{30}\text{ClNaNO}_9$ : 546.1501; found: 546.1506.

**1'-tert-butyl-2,2-diethyl-5'-bromo-3-formyl-6-hydroxy-2'-oxospiro[cyclohexane-1,3'-indoline]-1',2,2-tricarboxylate (3m)** : White solid; m.p. 122-126 °C; 83% yield, 97.5% ee. The enantiomeric excess was determined by HPLC on Daicel Chiralpak

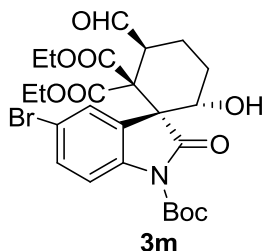

AD-H with hexane/*i*-PrOH (80:20) as the eluent. Flow: 1.0 mL/min;  $\lambda = 210$  nm:  $t_{\text{minor}} = 14.868$  min;  $t_{\text{major}} = 10.030$  min.

$[\alpha]_{\text{D}}^{10} -22.4$  (c 1.00 in  $\text{CH}_3\text{COCH}_3$ ).  $^1\text{H NMR}$  (400 MHz,  $\text{CDCl}_3$ )  $\delta$  9.74 (s, 1H), 7.73 (d,  $J = 8.8$  Hz, 1H), 7.44 (d,  $J = 8.8$  Hz, 1H), 7.33 (s, 1H), 4.59 - 4.55 (m, 1H), 4.32 - 4.22 (m, 2H), 3.99 -

3.93 (m, 2H), 3.92 - 3.87 (m, 1H), 2.27 - 2.16 (m, 1H), 2.08 - 1.94 (m, 3H), 1.87 (s, 1H), 1.58 (s, 9H), 1.23 (t,  $J = 7.2$  Hz, 3H), 0.94 (t,  $J = 7.2$  Hz, 3H).  $^{13}\text{C NMR}$  (100 MHz,  $\text{CDCl}_3$ )  $\delta$  199.66, 173.49, 168.40, 167.95, 148.63, 140.69, 131.40, 131.04, 126.07, 117.14, 116.05, 84.66, 73.03, 62.26, 62.19, 61.45, 56.47, 49.53, 27.94, 26.66, 21.00, 13.72, 13.13. ESI-MS:  $[\text{M} + \text{Na}]^+$   $m/z = 590.1$ ; HRMS:  $m/z$   $[\text{M} + \text{Na}]^+$  calcd for  $\text{C}_{25}\text{H}_{30}\text{Br}^{79}\text{NO}_9$ : 590.0996; found: 590.0993.

**1'-tert-butyl-2,2-diethyl-6'-bromo-3-formyl-6-hydroxy-2'-oxospiro[cyclohexane-1,3'-indoline]-1',2,2-tricarboxylate (3n)** : White solid; m.p. 130-131 °C; 74% yield,

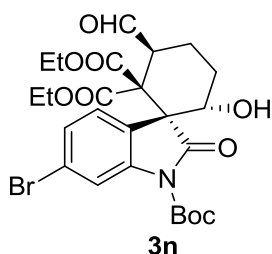

97.2% ee. The enantiomeric excess was determined by HPLC on Daicel Chiralpak AD-H with hexane/*i*-PrOH (80:20) as the eluent. Flow: 1.0 mL/min;  $\lambda = 210$  nm:  $t_{\text{minor}} = 9.430$  min;  $t_{\text{major}} = 5.566$  min.  $[\alpha]_{\text{D}}^{10} +10.5$  (c 1.00 in  $\text{CH}_3\text{COCH}_3$ ).  $^1\text{H NMR}$  (400 MHz,  $\text{CDCl}_3$ )  $\delta$  9.77 (s, 1H), 8.06 (s, 1H), 7.28 (d,  $J = 8.8$  Hz, 1H), 7.10 (d,  $J = 4.0$  Hz, 1H), 4.61 - 4.57 (m, 1H), 4.27 - 4.23 (m, 2H), 4.02 - 3.98

(m, 2H), 3.96 - 3.88 (m, 1H), 2.26 - 2.17 (m, 1H), 2.14 (s, 1H), 2.08 - 1.96 (m, 3H), 1.60 (s, 9H), 1.22 (t,  $J = 6.8$  Hz, 3H), 0.98 (t,  $J = 6.8$  Hz, 3H).  $^{13}\text{C NMR}$  (100MHz,  $\text{CDCl}_3$ )  $\delta$  199.77, 173.68, 168.39, 167.87, 148.51, 142.60, 127.95, 127.07, 124.21, 122.25, 117.86, 84.81, 72.82, 62.18, 62.14, 61.53, 56.43, 49.42, 27.88, 26.65, 20.91, 13.62, 13.12. ppm; ESI-MS:  $[\text{M} + \text{Na}]^+$   $m/z = 590.1$ ; HRMS:  $m/z$   $[\text{M} + \text{Na}]^+$  calcd for  $\text{C}_{25}\text{H}_{30}\text{Br}^{79}\text{NaNO}_9$ : 590.0996; found: 590.0991.



**1'-tert-butyl-2,2-dimethyl-3-formyl-6-hydroxy-2'-oxospiro[cyclohexane-1,3'-indoline]-1',2,2-tricarboxylate (3o)** : White solid; m.p. 57-58 °C; 67% yield, 98.3% ee.

The enantiomeric excess was determined by HPLC on Daicel Chiralpak AD-H with

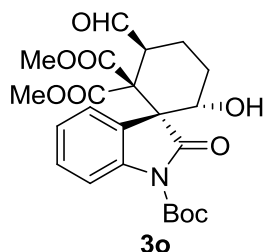

hexane/*i*-PrOH (80:20) as the eluent. Flow: 1.0 mL/min;  $\lambda = 210$  nm:  $t_{\text{minor}} = 15.542$  min;  $t_{\text{major}} = 8.964$  min.  $[\alpha]_{\text{D}}^{10} +68.8$  (c 0.80 in  $\text{CH}_3\text{COCH}_3$ ).  $^1\text{H}$  NMR (400 MHz,  $\text{CDCl}_3$ )  $\delta$  9.77 (s, 1H), 7.84 (d,  $J = 8.4$  Hz, 1H), 7.35 (t,  $J = 6.8$  Hz, 1H), 7.17 - 7.13 (m, 2H), 4.63 - 4.58 (m, 1H), 4.09 - 4.05 (m, 1H), 3.78 (m,

3H), 3.48 (s, 3H), 2.30 - 2.22 (m, 1H), 2.12 - 2.07 (m, 2H), 2.04 (s, 1H), 2.02 - 1.98 (m, 1H), 1.62 (s, 9H).  $^{13}\text{C}$  NMR (100 MHz,  $\text{CDCl}_3$ )  $\delta$  200.09, 174.57, 169.37, 168.77, 149.05, 141.86, 129.11, 128.74, 124.70, 122.83, 114.93, 84.66, 73.34, 61.89, 56.86, 53.09, 53.05, 50.05, 28.27, 26.72, 21.27. ESI-MS:  $[\text{M} + \text{Na}]^+$   $m/z = 484.2$ ; HRMS:  $m/z$   $[\text{M} + \text{H}]^+$  calcd for  $\text{C}_{23}\text{H}_{28}\text{NO}_9$ : 462.1759; found: 462.1769.

**1'-tert-butyl-2,2-diisopropyl-3-formyl-6-hydroxy-2'-oxospiro[cyclohexane-1,3'-indoline]-1',2,2-tricarboxylate (3p)**: White solid; m.p. 101-102 °C; 87% yield, >99% ee.

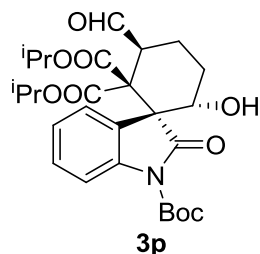

The enantiomeric excess was determined by HPLC on Daicel Chiralpak AD-H with hexane/*i*-PrOH (75:25) as the eluent. Flow: 0.6 mL/min;  $\lambda = 210$  nm:  $t_{\text{minor}} = 16.091$  min;  $t_{\text{major}} = 8.159$  min.  $[\alpha]_{\text{D}}^{10} +10.5$  (c 1.00 in  $\text{CH}_3\text{COCH}_3$ ).  $^1\text{H}$  NMR (400 MHz,  $\text{CDCl}_3$ )  $\delta$  9.81 (s, 1H), 7.87 (d,  $J = 8.0$  Hz, 1H), 7.32

(m, 2H), 7.13 (t,  $J = 6.8$  Hz, 1H), 5.23 - 5.17 (m, 1H), 4.85 - 4.80 (m, 1H), 4.68 (dd,  $J = 4.4, 6.8$  Hz, 1H), 4.065 (t,  $J = 8.0$  Hz, 1H), 2.27 - 2.20 (m, 1H), 2.11 - 2.04 (m, 2H), 2.00 - 1.96 (m, 1H), 1.93 (s, 1H), 1.61 (s, 9H), 1.27 (d,  $J = 6.4$  Hz, 3H), 1.16 (d,  $J = 6.4$  Hz, 3H), 0.95 (d,  $J = 6.4$  Hz, 3H), 0.86 (d,  $J = 6.4$  Hz, 3H).  $^{13}\text{C}$  NMR (100 MHz,  $\text{CDCl}_3$ )  $\delta$  200.12, 173.94, 168.09, 167.56, 148.90, 141.61, 128.74, 128.64, 124.08, 123.11, 114.45, 84.29, 73.13, 70.27, 69.99, 61.49, 56.54, 49.57, 28.01, 26.43, 21.58, 21.26, 21.01, 20.84, 20.56. ESI-MS:  $[\text{M} + \text{Na}]^+$   $m/z = 540.3$ ; HRMS:  $m/z$   $[\text{M} + \text{Na}]^+$  calcd for  $\text{C}_{27}\text{H}_{35}\text{NaNO}_9$ : 540.2204; found: 540.2194.

**2,2-dibenzyl-1'-tert-butyl-3-formyl-6-hydroxy-2'-oxospiro[cyclohexane-1,3'-indoline]-1',2,2-tricarboxylate (3q) :** White solid; m.p. 41-43 °C; 83% yield, >99% ee.

The enantiomeric excess was determined by HPLC on Daicel Chiralpak OD-H with

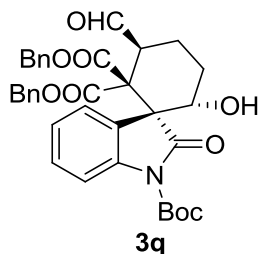

hexane/i-PrOH (90:10) as the eluent. Flow: 1 mL/min;  $\lambda = 210$

nm:  $t_{\text{minor}} = 27.711$  min;  $t_{\text{major}} = 17.986$  min.  $[\alpha]_{\text{D}}^{10} -2.52$  (c 0.75 in  $\text{CH}_3\text{COCH}_3$ ).  $^1\text{H}$  NMR (400 MHz,  $\text{CDCl}_3$ )  $\delta$  9.78 (s, 1H),

7.51 (d,  $J = 7.2$  Hz, 1H), 7.27 (d,  $J = 8.0$  Hz, 4H), 7.14 (d,  $J = 6.4$  Hz, 5H), 7.03 (d,  $J = 6.4$  Hz, 1H), 6.87 (s, 1H), 6.73 (d,  $J$

$= 5.2$  Hz, 2H), 5.30 (d,  $J = 12$  Hz, 1H), 5.08 (d,  $J = 11.6$  Hz, 1H), 4.89 (d,  $J = 11.6$  Hz, 1H), 4.71 (d,  $J = 12$  Hz, 1H), 4.60 (d,  $J = 4.4$  Hz, 1H), 4.15 (s, 1H), 2.25 - 2.23 (m, 1H), 2.11 (s, 2H), 1.98 (d,  $J = 8.8$  Hz, 1H), 1.58 (s, 9H).  $^{13}\text{C}$  NMR (100 MHz,  $\text{CDCl}_3$ )  $\delta$  199.94, 174.10, 168.44, 167.92, 148.57, 141.31, 134.34, 133.68, 128.54, 128.45,

128.22, 128.08, 124.16, 122.58, 114.67, 84.26, 73.20, 68.16, 67.90, 61.44, 56.50, 49.85, 28.00, 26.35, 21.01. ESI-MS:  $[\text{M} + \text{Na}]^+$   $m/z = 636.3$ ; HRMS:  $m/z$   $[\text{M} + \text{Na}]^+$  calcd for  $\text{C}_{35}\text{H}_{35}\text{NaNO}_9$ : 636.2204; found: 636.2197.

**1'-tert-butyl-2,2-dicyclohexyl-3-formyl-6-hydroxy-2'-oxospiro[cyclohexane-1,3'-indoline]-1',2,2-tricarboxylate (3r) :** White solid; m.p. 68-69 °C; 88% yield, >99% ee.

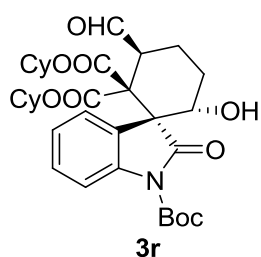

The enantiomeric excess was determined by HPLC on Daicel Chiralpak AD-H with hexane/i-PrOH (90:10) as the eluent. Flow: 1 mL/min;  $\lambda = 210$  nm:  $t_{\text{minor}} = 30.646$  min;  $t_{\text{major}} = 8.641$

min.  $[\alpha]_{\text{D}}^{10} +4.9$  (c 0.80 in  $\text{CH}_3\text{COCH}_3$ ).  $^1\text{H}$  NMR (400 MHz,  $\text{CDCl}_3$ )  $\delta$  9.81 (s, 1H), 7.88 (d,  $J = 8.0$  Hz, 1H), 7.35 - 7.27 (m, 2H), 7.13 (t,  $J = 6.8$  Hz, 1H), 4.97 (s, 1H), 4.65 (d,  $J = 8.8$  Hz, 1H), 4.57 (s, 1H), 4.06 (d,  $J = 6.4$  Hz, 1H), 2.24 - 2.19 (m, 1H), 2.08 (s, 2H), 2.00 - 1.91 (m, 2H), 1.77 (s, 1H), 1.61 (s, 9H), 1.51 - 1.32 (m, 11H), 1.19 (d,  $J = 7.2$  Hz, 4H), 1.07 - 0.89 (m, 4H).  $^{13}\text{C}$  NMR (100MHz,  $\text{CDCl}_3$ )  $\delta$  200.11, 174.02, 168.23, 167.61, 148.86, 141.58, 128.65, 124.13, 123.02, 114.55, 84.22, 75.33, 75.22, 73.28, 61.63, 56.53, 49.68, 31.22, 30.94, 30.66, 30.53, 28.00, 26.38, 25.06, 24.95, 23.61, 23.39, 21.14. ESI-MS:  $[\text{M} + \text{Na}]^+$   $m/z = 620.3$ ; HRMS:  $m/z$   $[\text{M} + \text{Na}]^+$  calcd for  $\text{C}_{33}\text{H}_{43}\text{NaNO}_9$ : 620.2836; found: 620.2831.

**diethyl-3-formyl-6-hydroxy-2'-oxospiro[cyclohexane-1,3'-indoline]-2,2-dicarboxylate**

**(4):** White solid; m.p. 135-136 °C; 93% yield, >99% ee. The enantiomeric excess was determined by HPLC on Daicel Chiralpak AD-H with hexane/*i*-PrOH (80:20) as

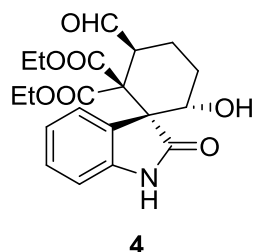

the eluent. Flow: 1 mL/min;  $\lambda = 210$  nm:  $t_{\text{minor}} = 56.182$  min;  $t_{\text{major}} = 15.200$  min.  $[\alpha]_{\text{D}}^{10} +11.2$  (c 0.20 in  $\text{CH}_3\text{COCH}_3$ ).  $^1\text{H}$  NMR (300 MHz,  $\text{CDCl}_3$ )  $\delta$  9.78 (s, 1H), 8.67 (s, 1H) 7.27 (d,  $J = 7.8$  Hz, 1H), 7.19(t,  $J = 7.8$  Hz, 1H), 6.97 (t,  $J = 8.1$  Hz, 1H), 6.75 (d,  $J = 7.8$  Hz, 1H), 4.64 - 4.59 (m, 1H), 4.23 - 4.21(m, 2H),

4.15 - 4.11 (d,  $J = 12$ , 1H), 3.92 - 3.84 (m, 2H), 2.63(s, 1H), 2.26 (s, 1H), 2.09 - 2.05 (m, 1H), 1.91 - 1.77 (m, 2H), 1.19 (t,  $J = 7.8$  Hz, 3H), 0.83 (t,  $J = 7.8$  Hz, 3H).  $^{13}\text{C}$  NMR (75 MHz,  $\text{CDCl}_3$ )  $\delta$  200.73, 177.42, 168.45, 167.89, 142.56, 130.16, 128.39, 124.24, 122.35, 109.51, 72.06, 61.96, 61.92, 61.41, 57.20, 48.76, 26.38, 20.68, 13.72, 13.07. ESI-MS:  $[\text{M} + \text{Na}]^+$   $m/z = 412.1$ ; HRMS:  $m/z$   $[\text{M} + \text{Na}]^+$  calcd for  $\text{C}_{20}\text{H}_{23}\text{NNaO}_7$ : 412.1367; found: 412.1376.

**diethyl-6-hydroxy-3-(hydroxymethyl)-2'-oxospiro[cyclohexane-1,3'-indoline]-2,2-dicarboxylate**

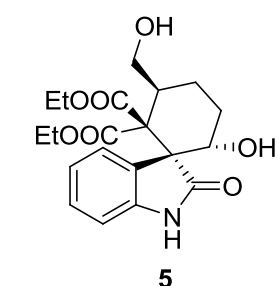

enantiomeric excess was determined by HPLC on Daicel Chiralpak AD-H with hexane/*i*-PrOH (70:30) as the eluent. Flow: 1 mL/min;  $\lambda = 210$  nm:  $t_{\text{minor}} = 16.209$  min;  $t_{\text{major}} = 10.345$  min.  $[\alpha]_{\text{D}}^{10} +74.1$  (c 0.65 in  $\text{CH}_3\text{COCH}_3$ ).  $^1\text{H}$  NMR (400 MHz,  $\text{CD}_3\text{OD}$ ) 7.37 (d,  $J = 7.6$  Hz, 1H), 7.21 (t,  $J = 7.6$

Hz, 1H), 7.00 (t,  $J = 7.6$  Hz, 1H), 6.82 (d,  $J = 8.0$  Hz, 1H), 4.34 - 4.27 (m, 1H), 4.16 - 4.12 (m, 1H), 3.96 - 3.85 (m, 2H), 3.81 - 3.74 (m, 1H), 3.34 (s, 1H), 3.31 - 3.25 (m, 1H), 3.14 (t,  $J = 8.8$  Hz, 1H), 2.46 - 2.35 (m, 1H), 2.22 - 2.18 (m, 1H), 1.89 - 1.85 (m, 1H), 1.75 - 1.64 (m, 1H), 1.26 (t,  $J = 7.2$  Hz, 3H), 0.83 (t,  $J = 7.2$  Hz, 3H).  $^{13}\text{C}$  NMR (100 MHz,  $\text{CD}_3\text{OD}$ )  $\delta$  178.71, 169.74, 169.38, 144.81, 133.74, 128.81, 125.69, 123.04, 109.98, 72.81, 65.22, 63.60, 62.41, 62.06, 59.39, 40.10, 28.64, 24.53, 14.43, 13.47. ESI-MS:  $[\text{M} + \text{Na}]^+$   $m/z = 414.1$ ; HRMS:  $m/z$   $[\text{M} + \text{H}]^+$  calcd for  $\text{C}_{20}\text{H}_{26}\text{NO}_7$ : 392.1704; found: 392.1708.

### D: X-ray crystal structure of *ent-3e*

Crystal structure determination of compound *ent-3e*: C<sub>25</sub>H<sub>31</sub>NO<sub>9</sub>, M = 489.51; a block crystal (0.75 x 0.5 x 0.4 mm), T = 293(2), λ (Mo-Kα) = 0.71070 Å, Monoclinic, space group: P 65, a = 18.8854(16) Å, b = 18.8854 (16) Å, c = 12.9167(11) Å, V = 3989.6(6) Å<sup>3</sup>, 19575 total reflections, 4808 unique, R<sub>int</sub> = 0.0426, R<sub>1</sub> = 0.0819 (I > 2 σ), wR<sub>2</sub> = 0.2389, Absolute structure parameter: -0.6(19). An ORTEP drawing of *ent-3e* is shown in Figure S1.

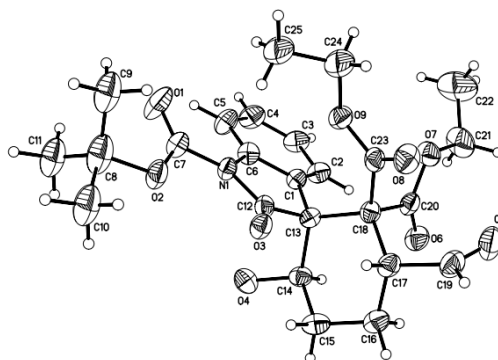

Figure S1. ORTEP drawing of *ent-3e* (40% thermal ellipsoids).

The crystal was prepared from the solution of *ent-3e* in dichloromethane. CCDC 875824 contains the supplementary crystallographic data for this paper. These data can be obtained free of charge from The Cambridge Crystallographic Data Centre via [www.ccdc.cam.ac.uk/data\\_request/cif](http://www.ccdc.cam.ac.uk/data_request/cif).

### E: References

1. X-C. hang, S-H. Cao, Y. Wei, M. Shi, *Org. Lett.* 2011, **13**, 1142.
2. S.J. Garden, C.R.W. Guimarães, M.B. Corrêa, C.A.F.D. Oliveira, A.d.C. Pinto, R.B.d. Alencastro, *J. Org. Chem.* 2003, **68**, 8815.
3. M. J. Frisch, G. W. Trucks, H. B. Schlegel, G. E. Scuseria, M. A. Robb, J. R. Cheeseman, J. A. Jr. Montgomery, T. Vreven, K. N. Kudin, J. C. Burant, J. M. Millam, S. S. Iyengar, J. Tomasi, V. Barone, B. Mennucci, M. Cossi, G. Scalmani, N. Rega, G. A. Petersson, H. Nakatsuji, M. Hada, M. Ehara, K. Toyota, R. Fukuda, J. Hasegawa, M. Ishida, T. Nakajima, Y. Honda, O. Kitao, H. Nakai, M. Klene, X. Li, J. E. Knox, H. P. Hratchian, J. B. Cross, C. Adamo, J. Jaramillo, R. Gomperts, R. E. Stratmann, O. Yazyev, A. J. Austin, R. Cammi, C. Pomelli, J. W. Ochterski, P. Y. Ayala, K. Morokuma, G. A. Voth, P. Salvador, J. J. Dannenberg, V. G. Zakrzewski, S. Dapprich, A. D. Daniels, M. C. Strain, O. Farkas, D. K. Malick, A. D. Rabuck, K. Raghavachari, J. B. Foresman, J. V. Ortiz, Q. Cui, A. G. Baboul, S. Clifford, J.

Cioslowski, B. B.Stefanov, G. Liu, A. Liashenko, P. Piskorz, I. Komaromi, R. L. Martin, D. J. Fox, T. Keith, M. A. Al-Laham, C. Y. Peng, A. Nanayakkara, M. Challacombe, P. M. W. Gill, B. Johnson, W. Chen, M. W. Wong. C. Gonzalez, J. A. Pople. *Gaussian 03*, Revision B.04; Gaussian, Inc.: Wallingford, CT, 2003.

### F: $^1\text{H}$ NMR and $^{13}\text{C}$ NMR Spectra

3d

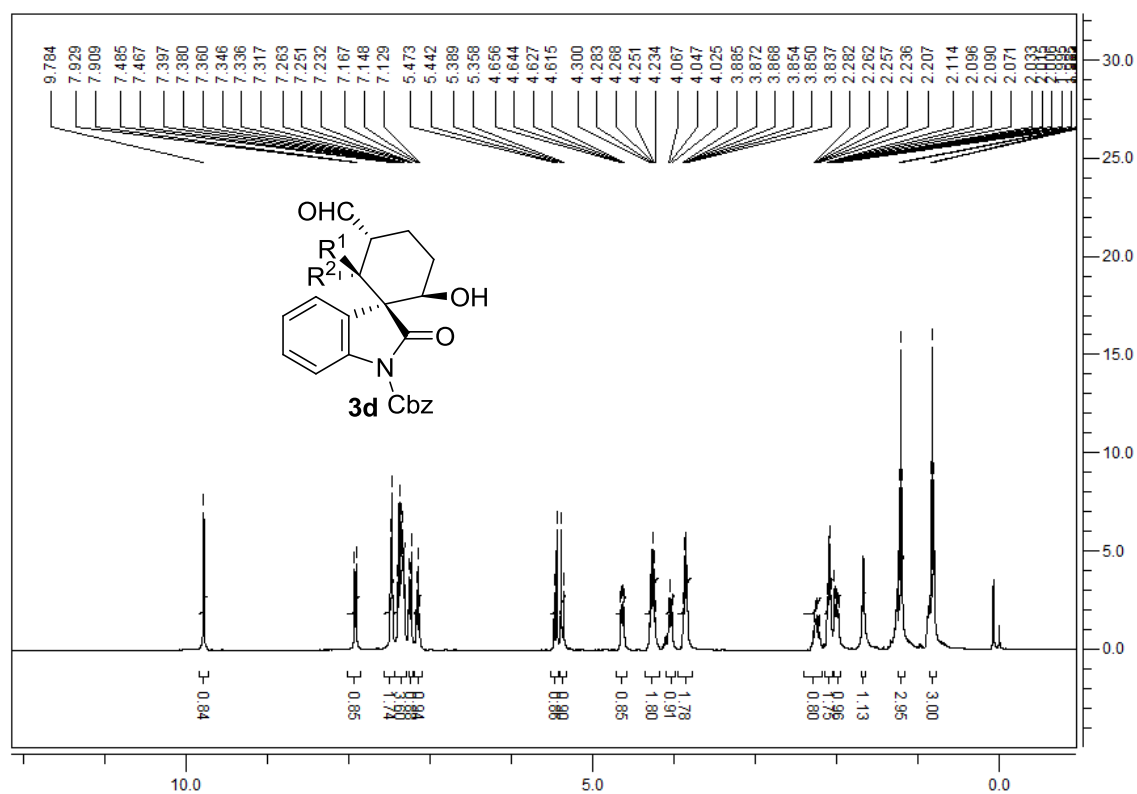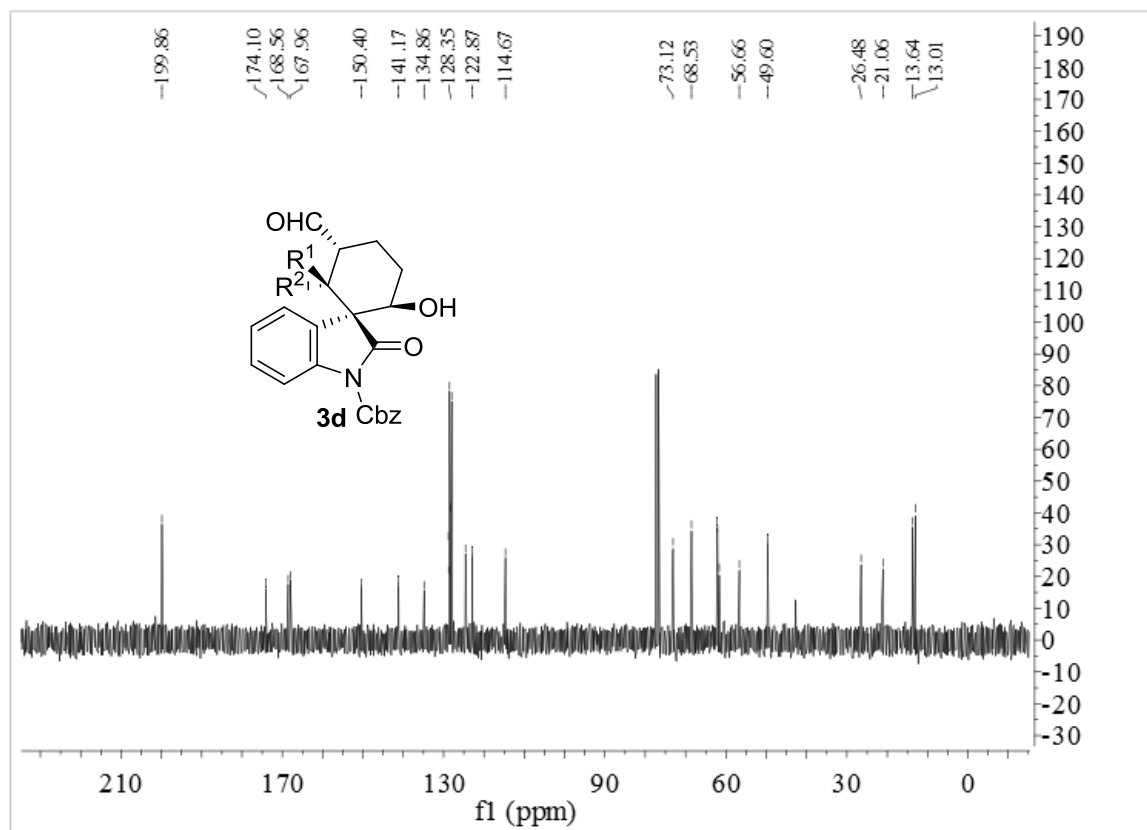







3g

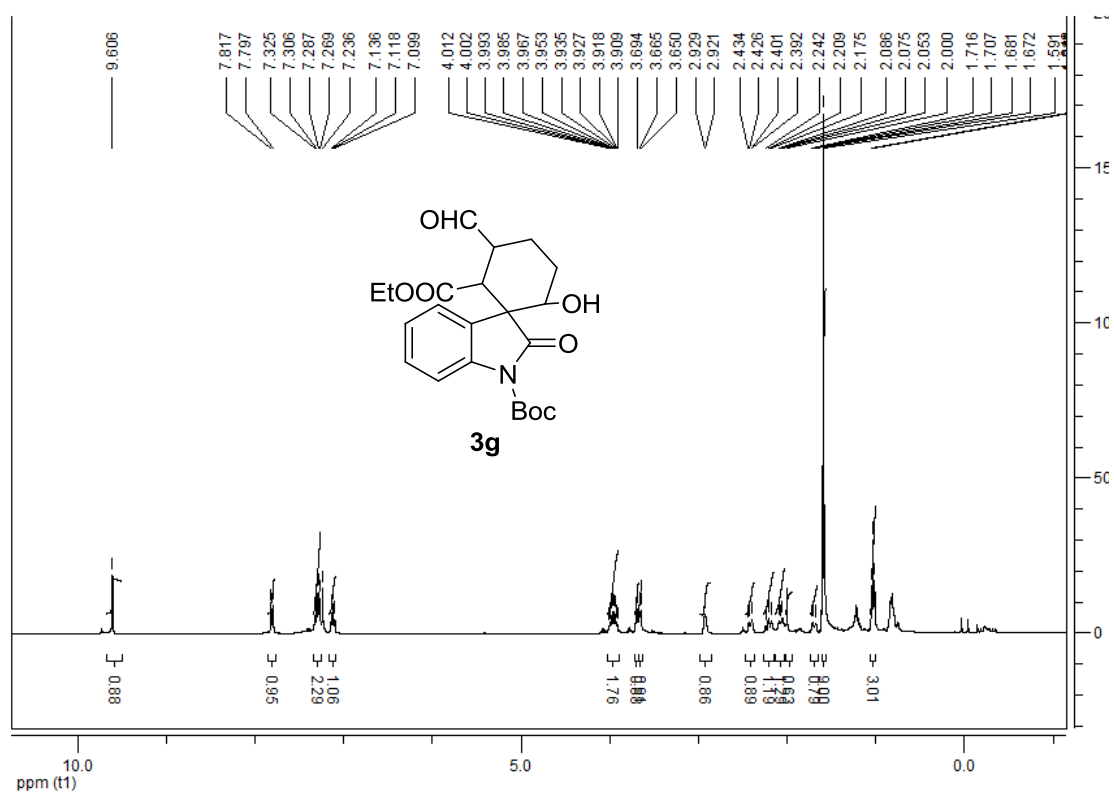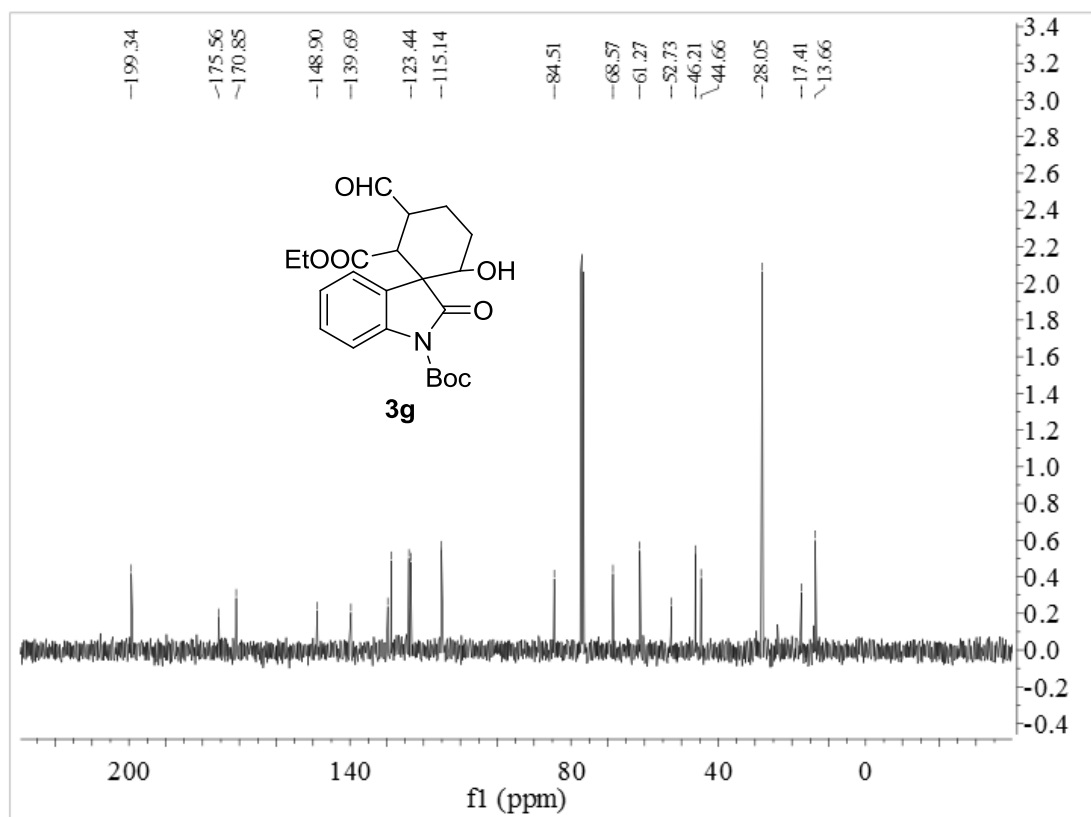

### 3h

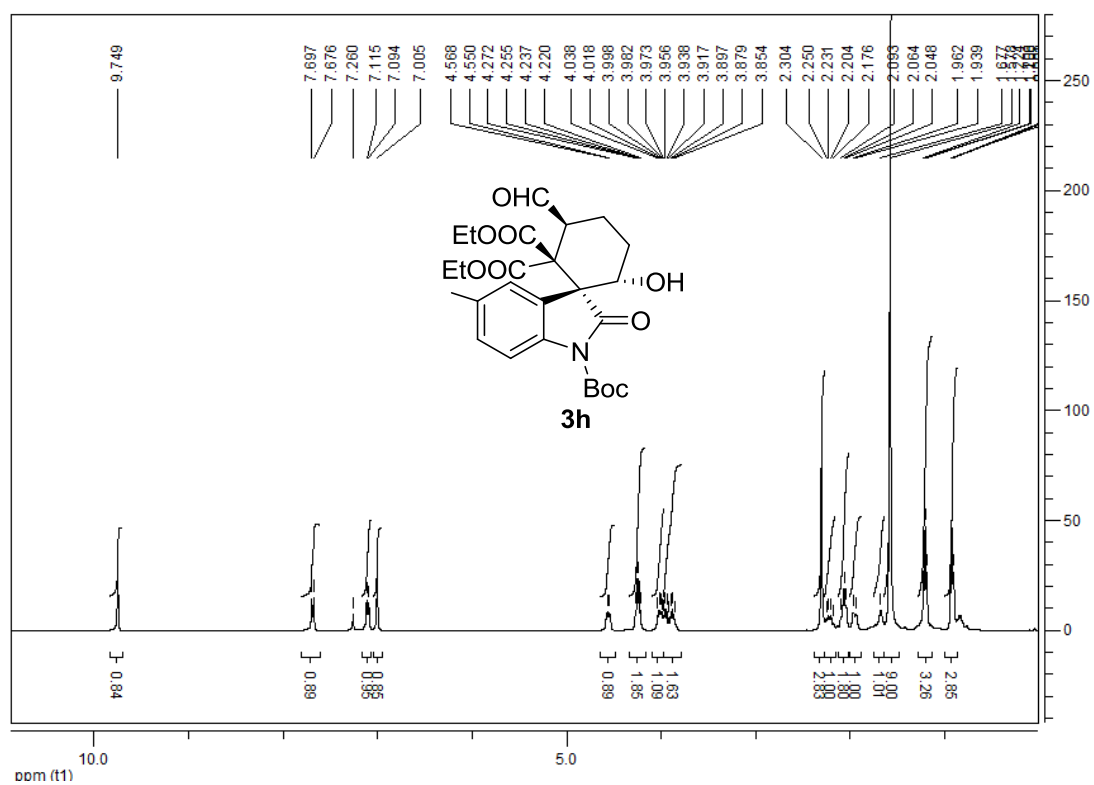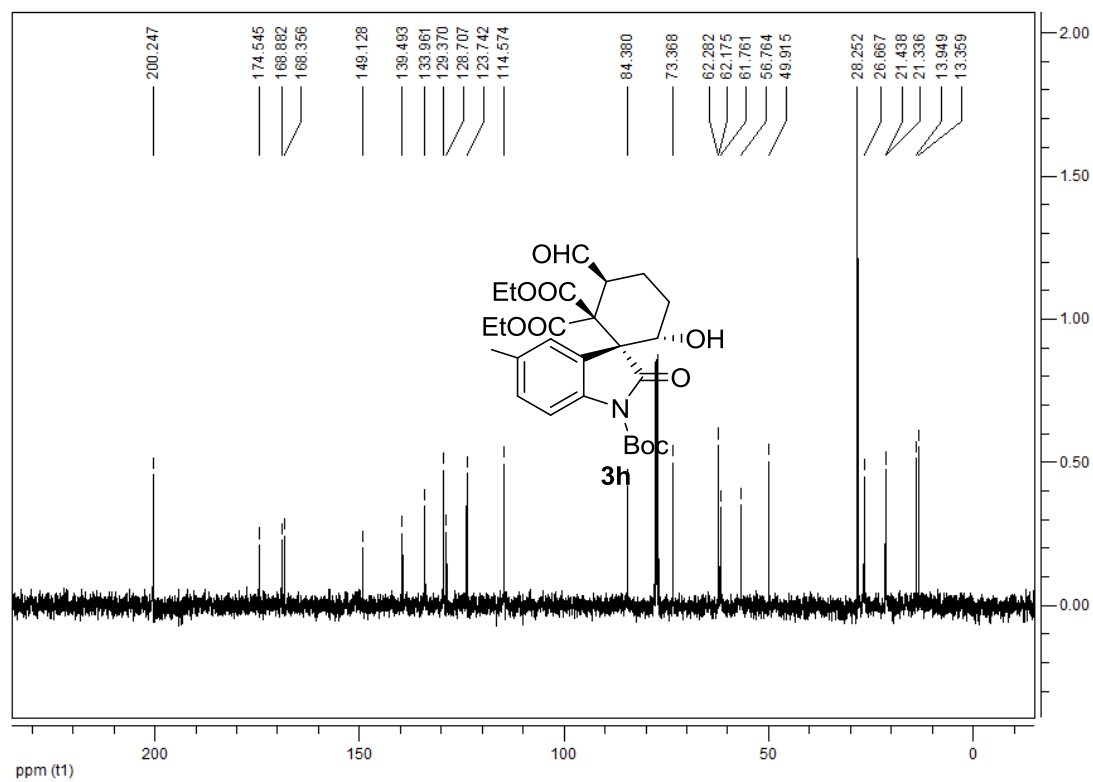





3k

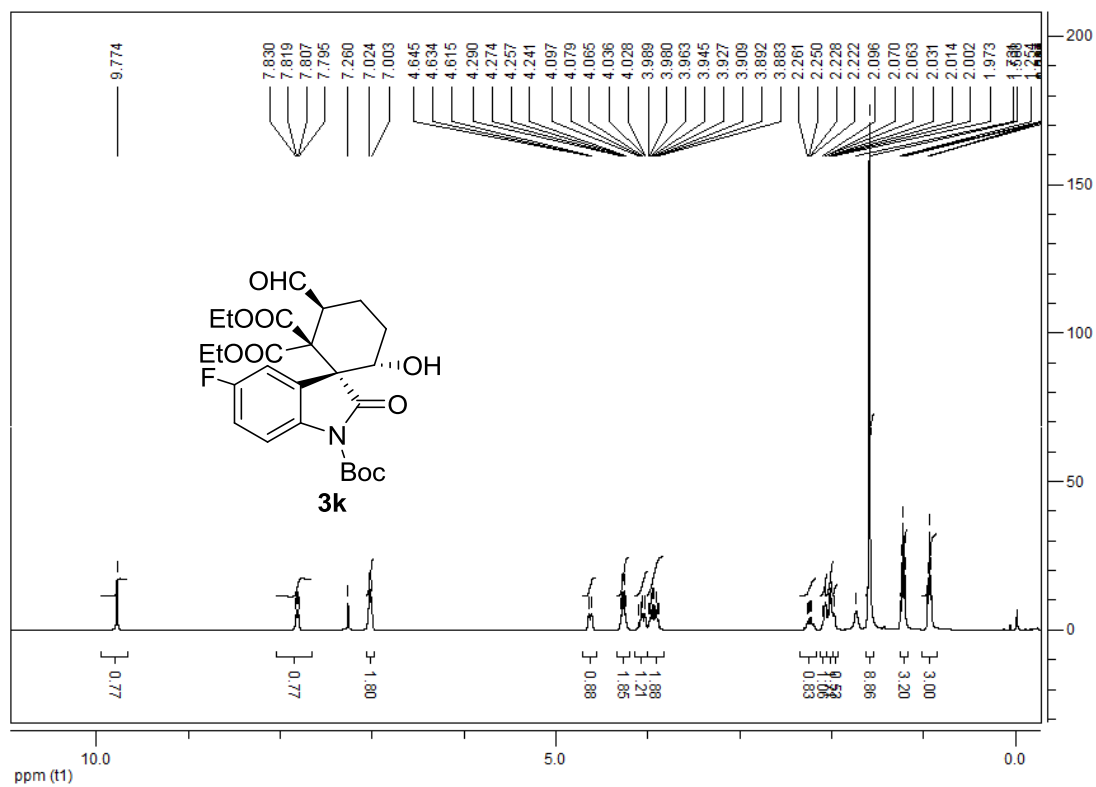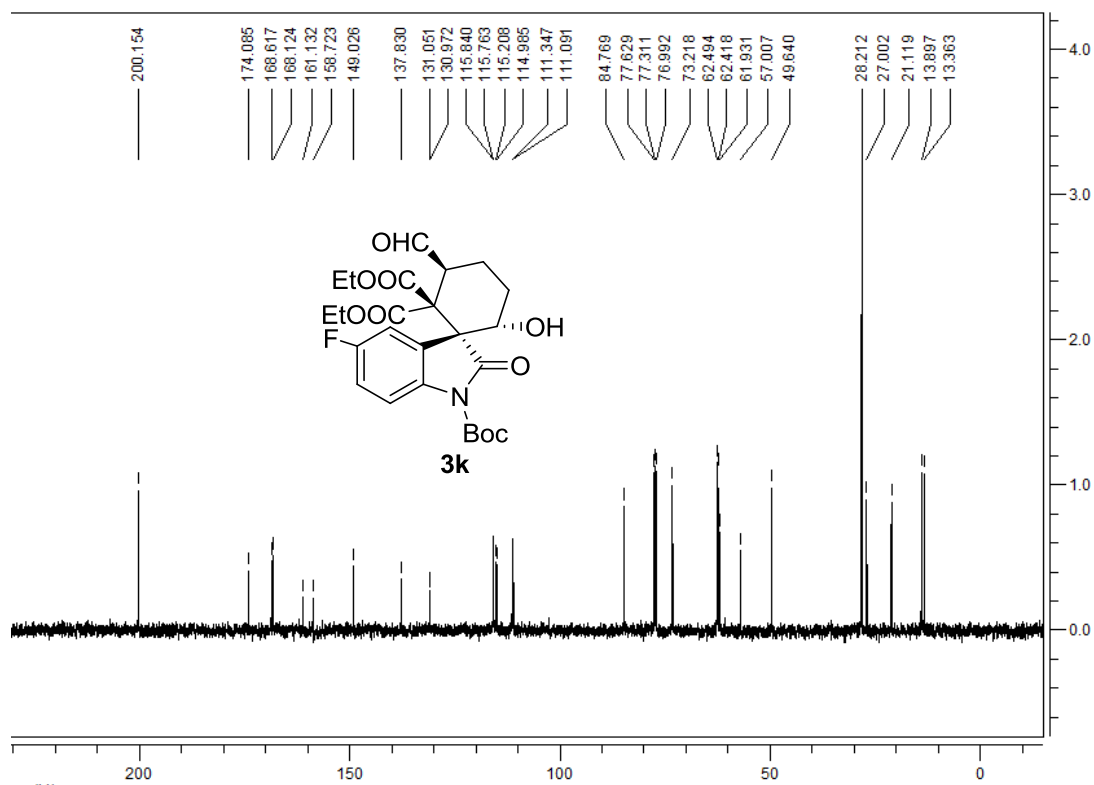

3I

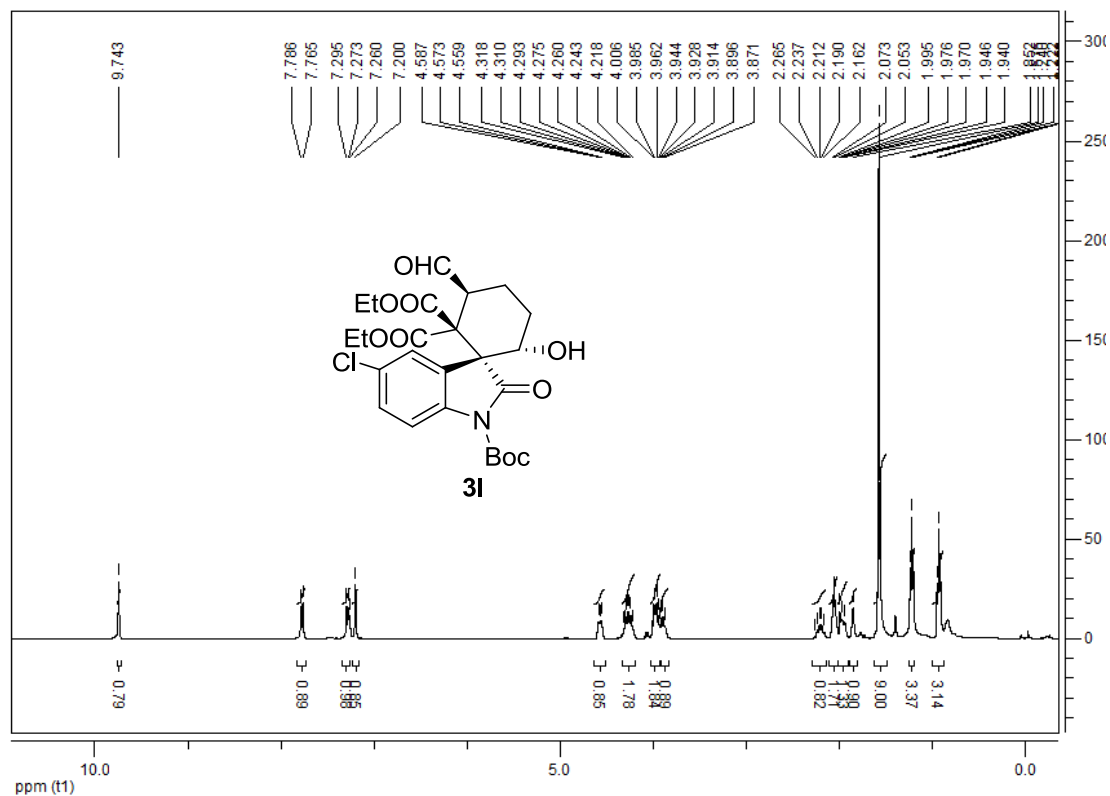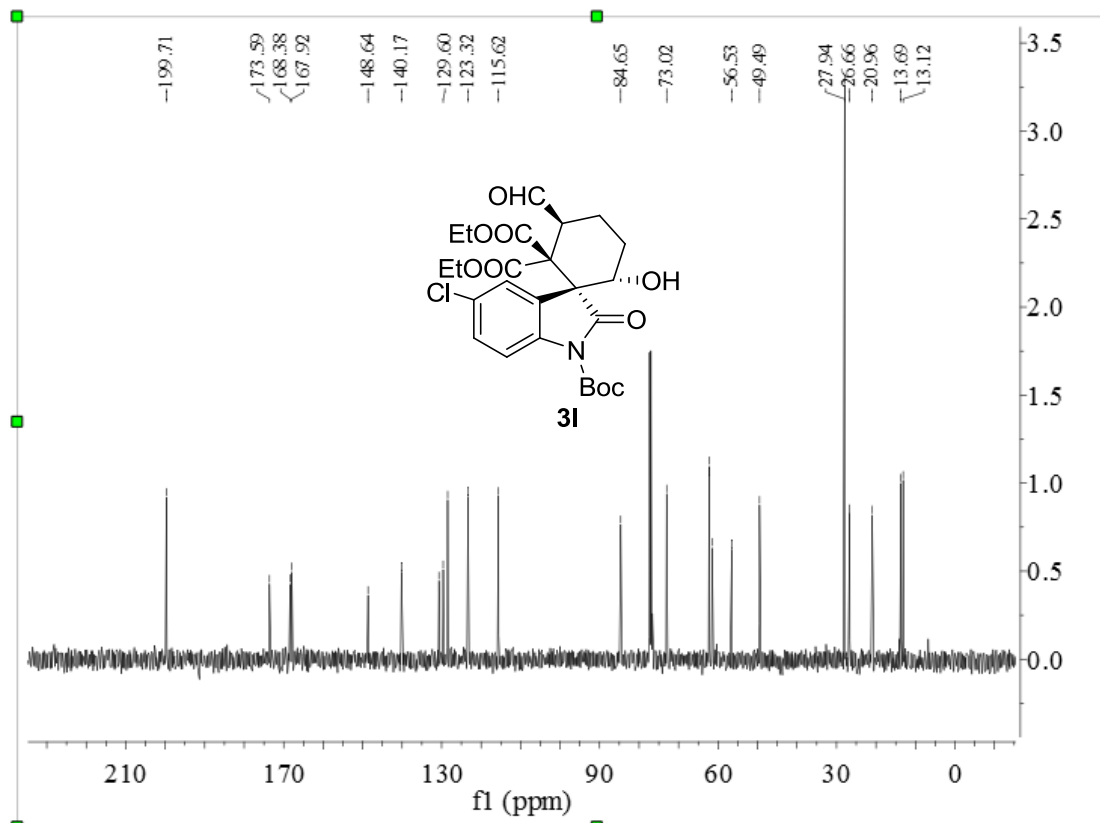

### 3m

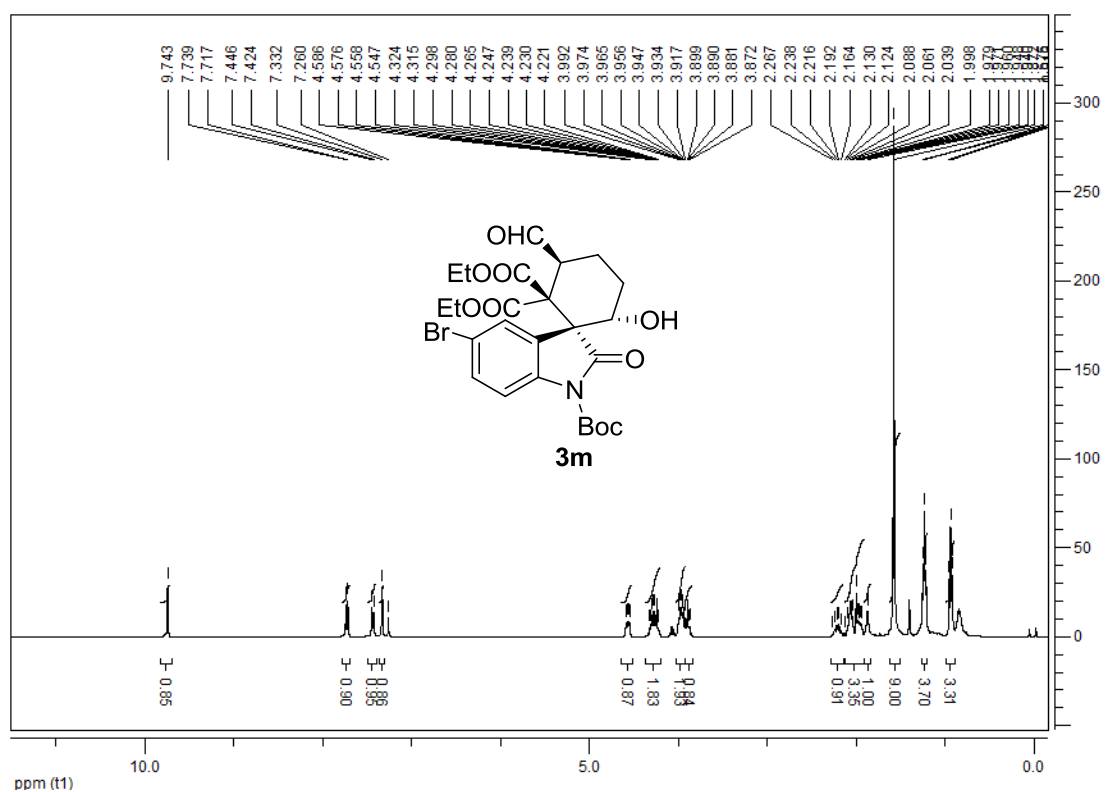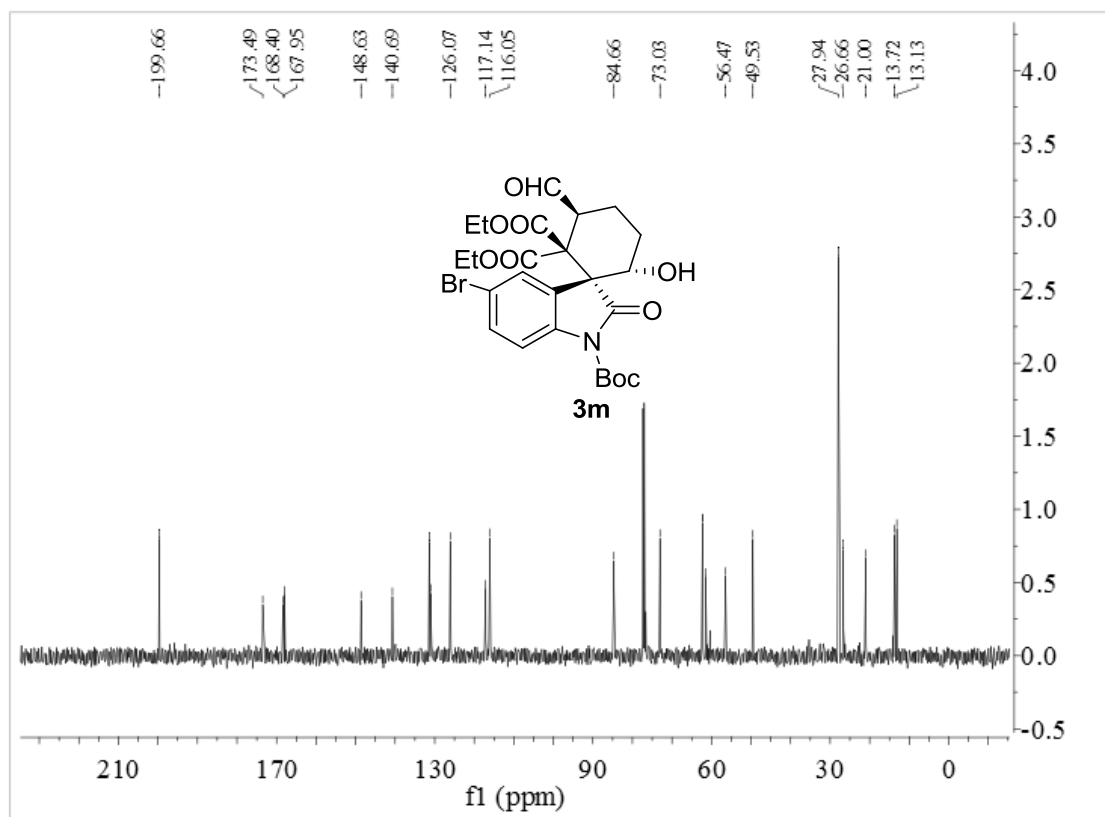





3o

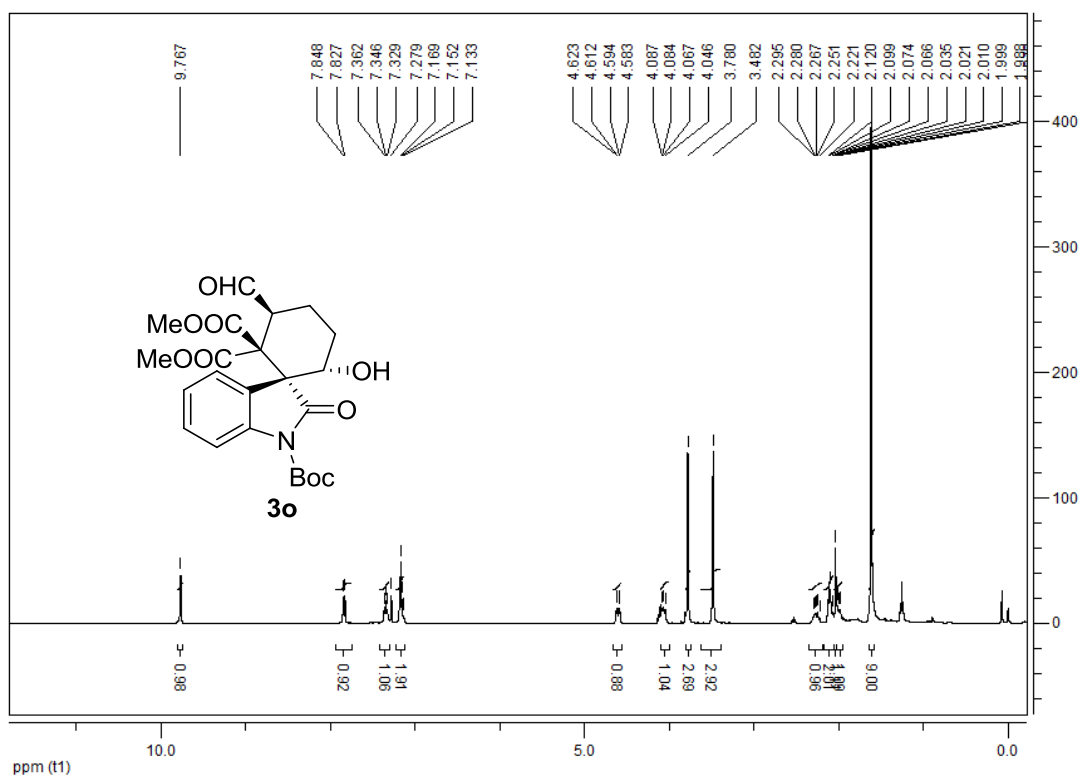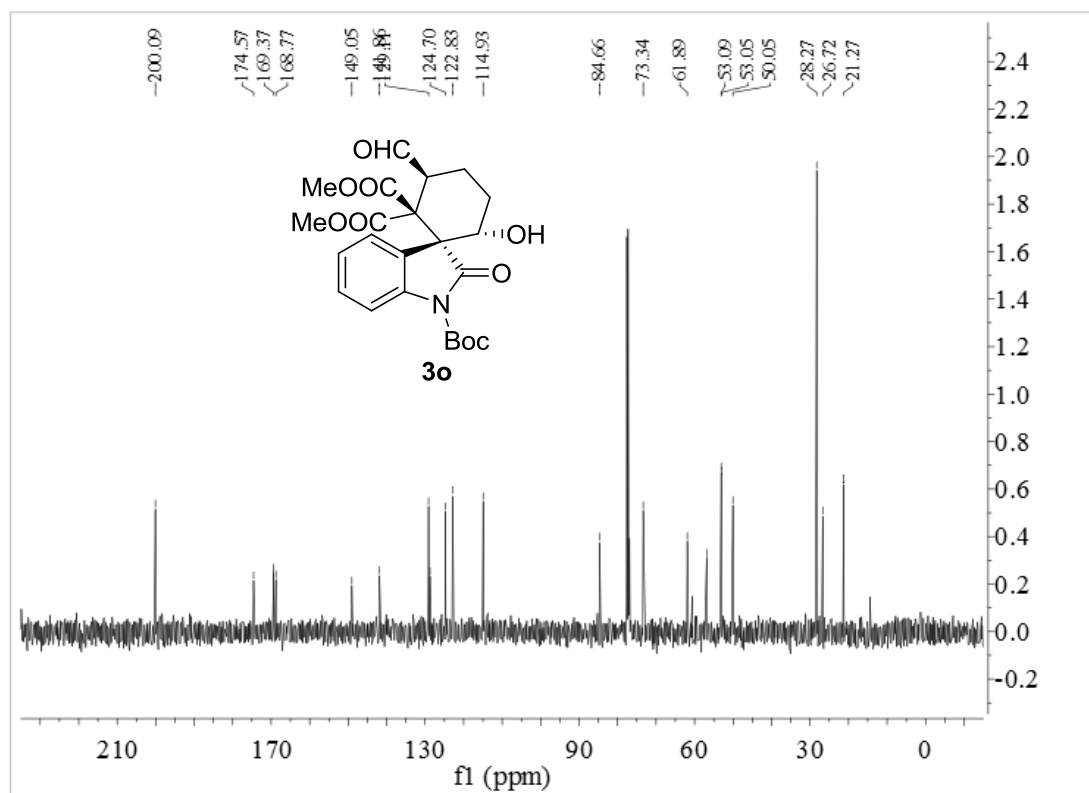

3p

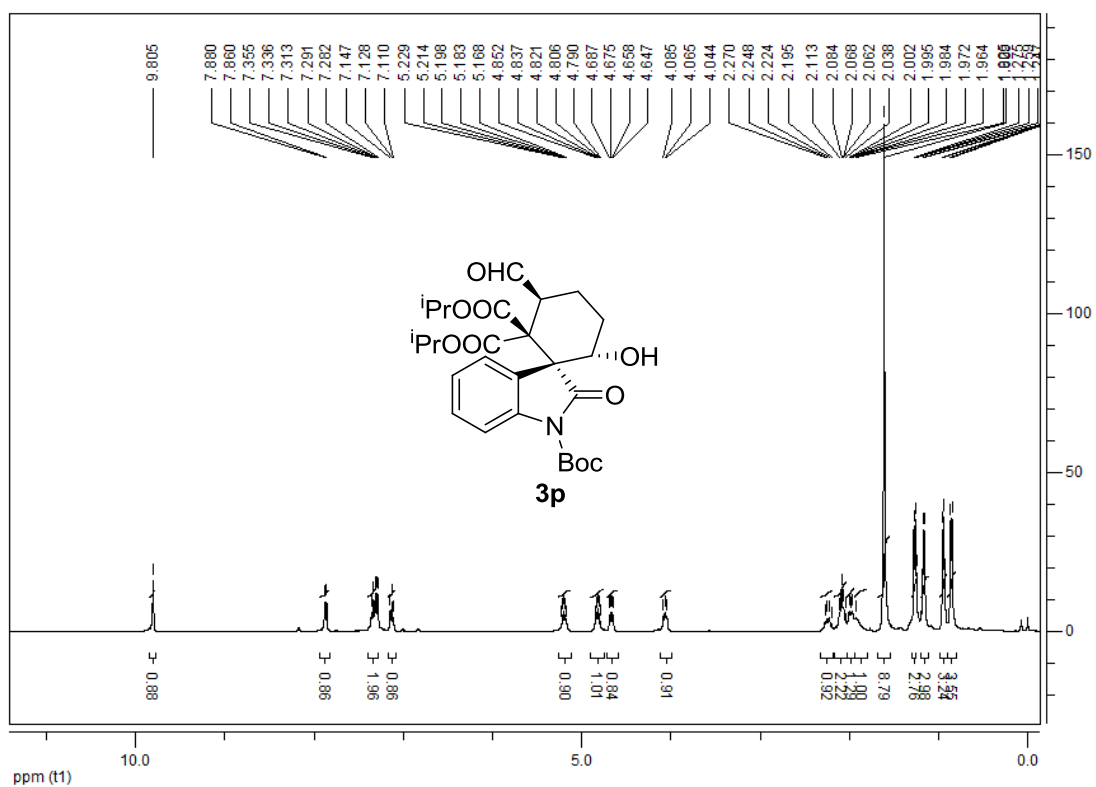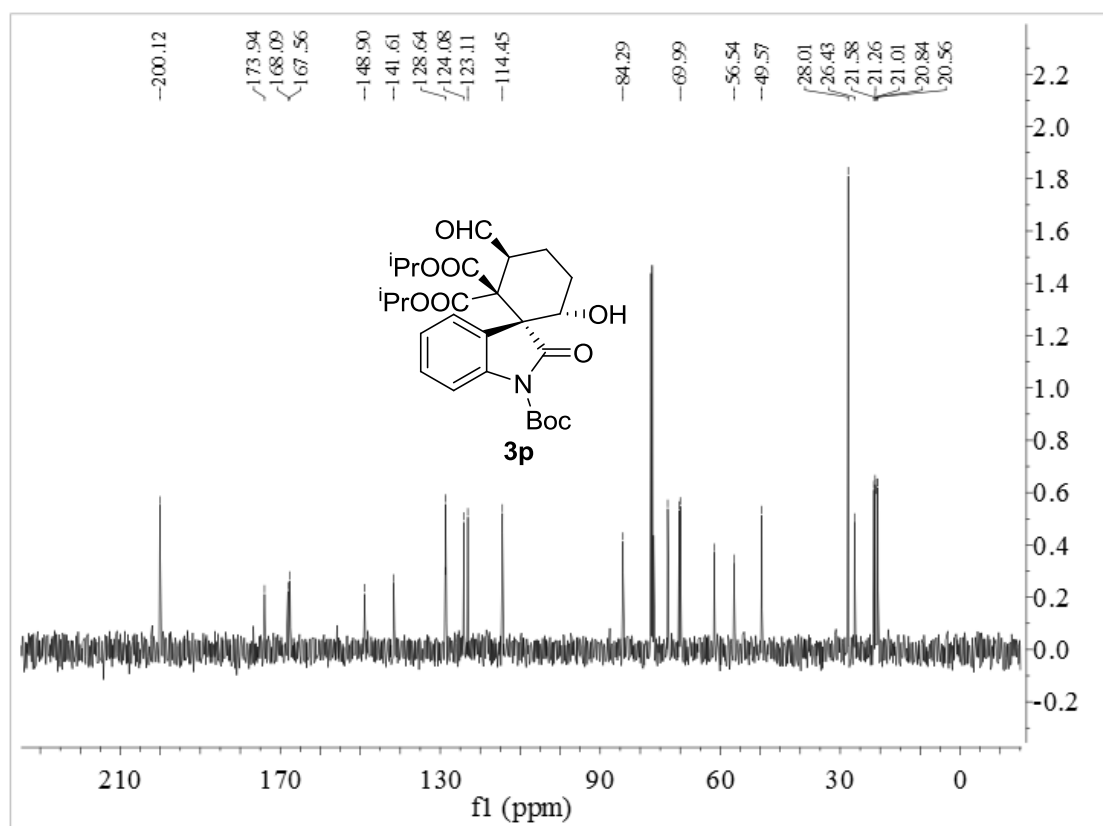

3q

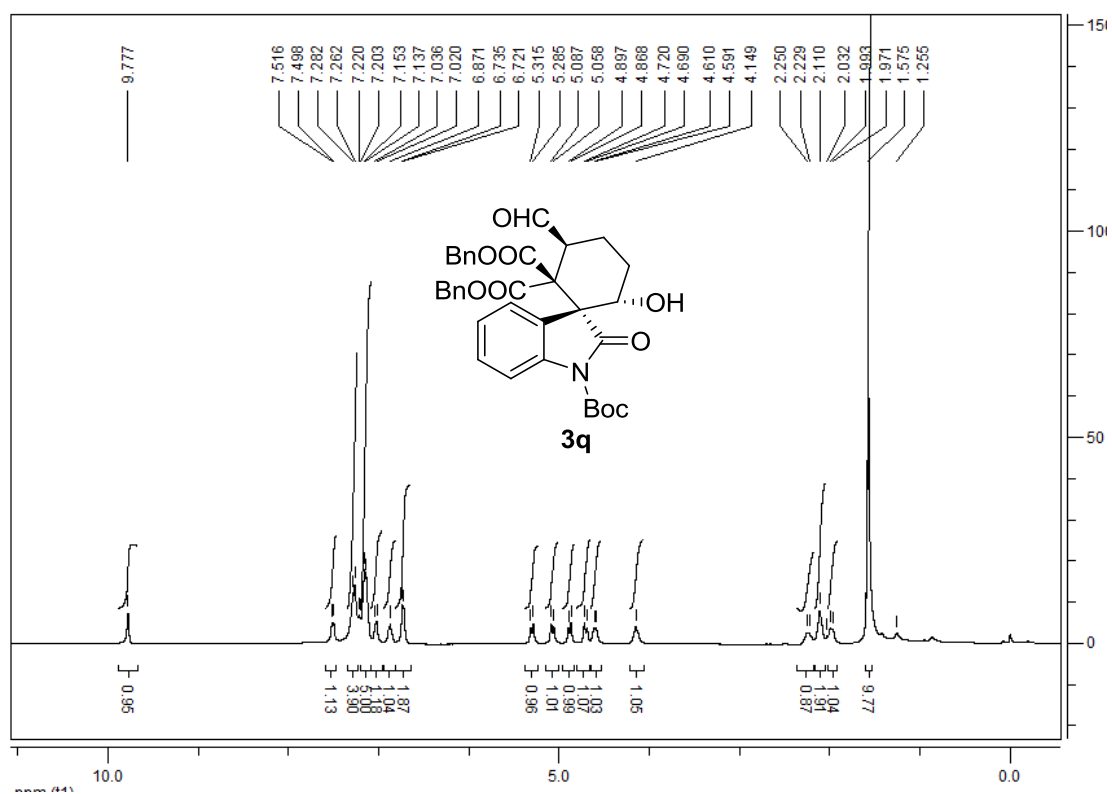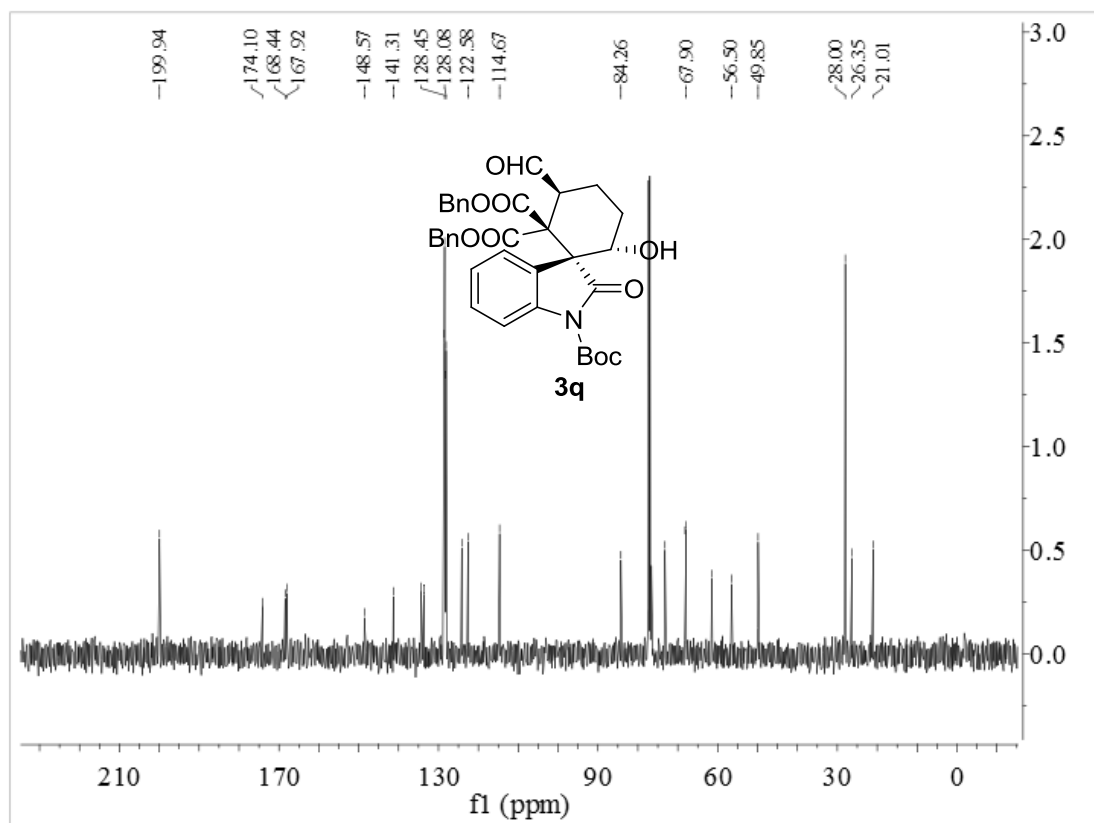

3r

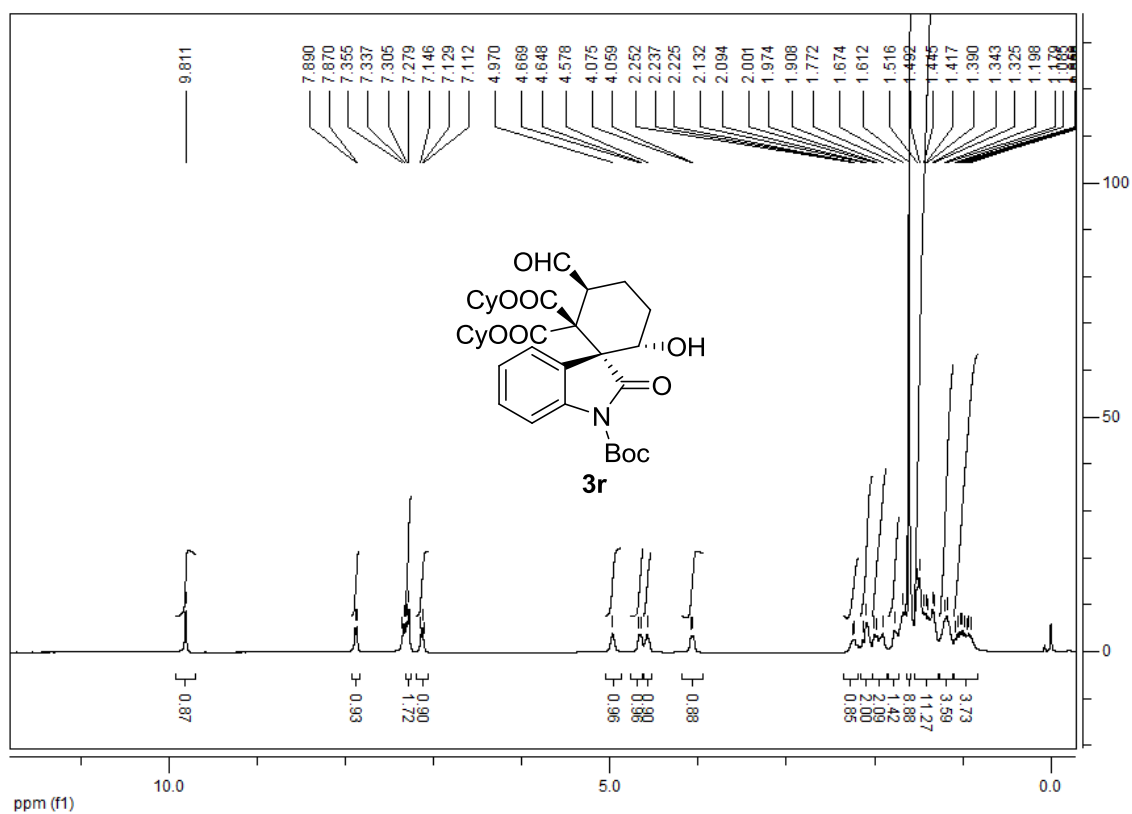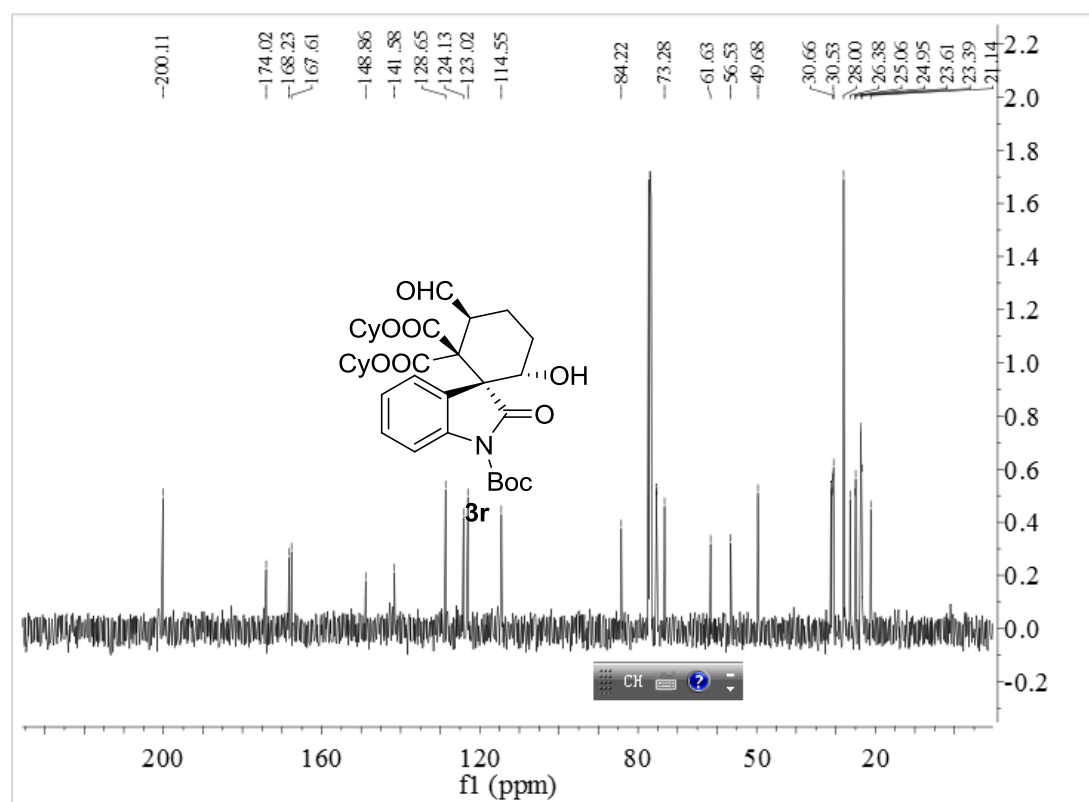

4

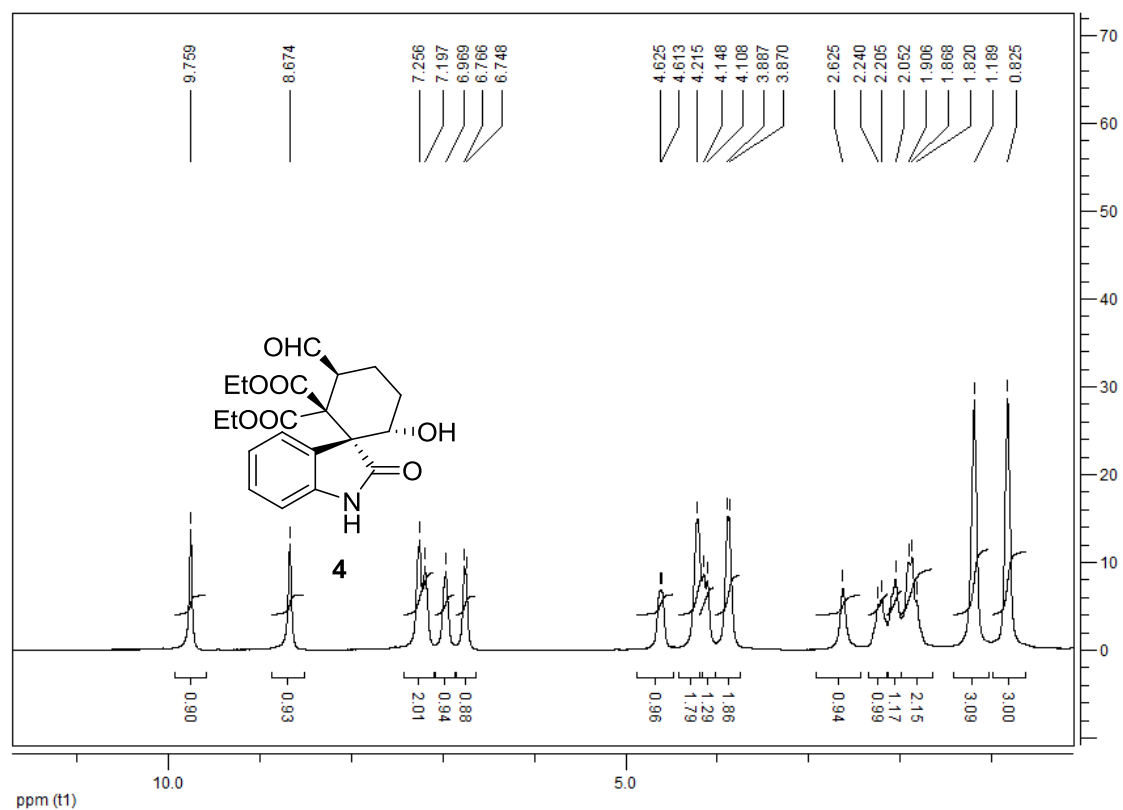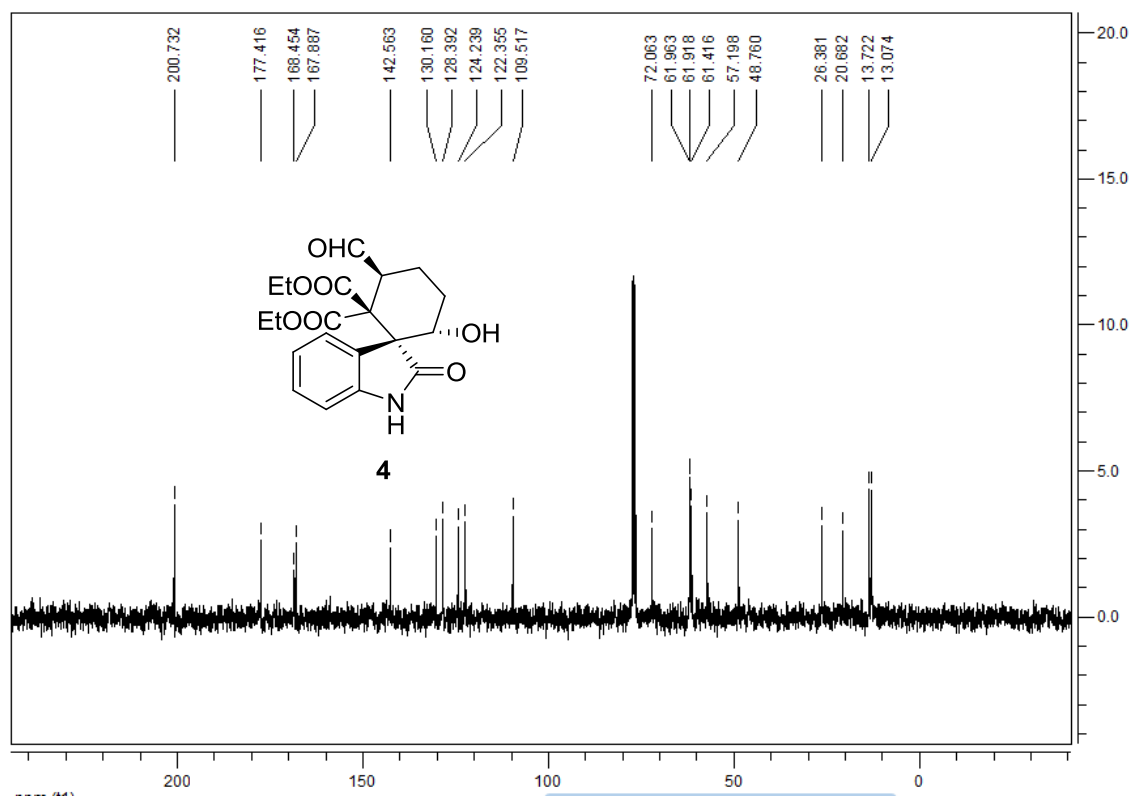



## G: HPLC Analysis

**3d**

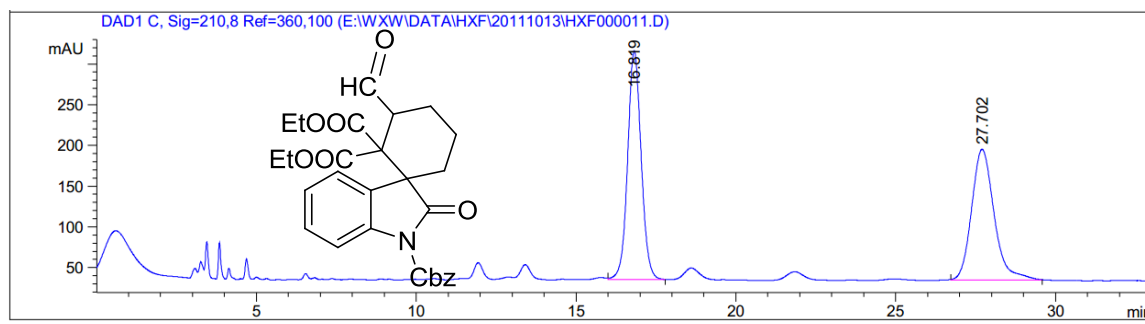

| Peak # | RetTime [min] | Type | Width [min] | Area [mAU*s] | Height [mAU] | Area %  |
|--------|---------------|------|-------------|--------------|--------------|---------|
| 1      | 16.819        | VB   | 0.4512      | 8263.34082   | 280.94308    | 51.1886 |
| 2      | 27.702        | BB   | 0.7563      | 7879.58643   | 160.63753    | 48.8114 |

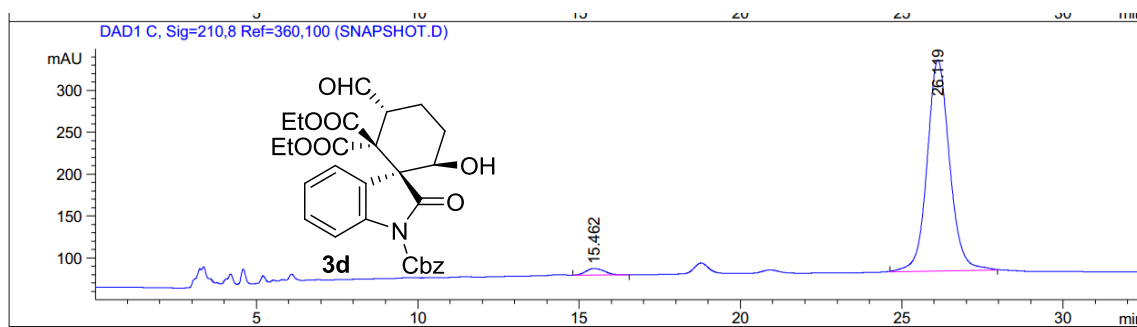

| Peak # | RetTime [min] | Type | Width [min] | Area [mAU*s] | Height [mAU] | Area %  |
|--------|---------------|------|-------------|--------------|--------------|---------|
| 1      | 15.462        | BB   | 0.5713      | 307.69272    | 7.81595      | 2.4614  |
| 2      | 26.119        | BB   | 0.7388      | 1.21929e4    | 251.87439    | 97.5386 |

**3e**

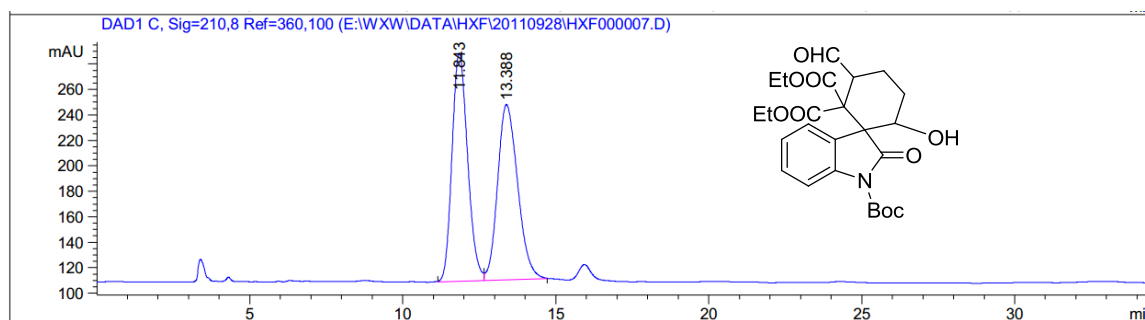

| Peak # | RetTime [min] | Type | Width [min] | Area [mAU*s] | Height [mAU] | Area %  |
|--------|---------------|------|-------------|--------------|--------------|---------|
| 1      | 11.843        | BV   | 0.5518      | 6347.70068   | 178.98714    | 50.2112 |
| 2      | 13.388        | VB   | 0.7211      | 6294.29102   | 137.74464    | 49.7888 |

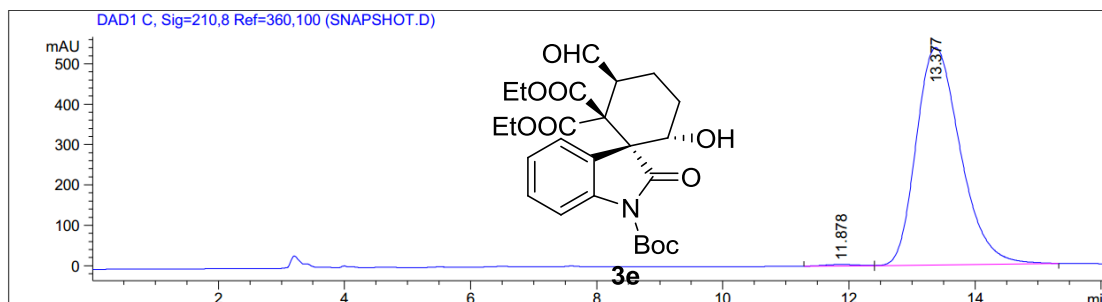

| Peak # | RetTime [min] | Type | Width [min] | Area [mAU*s] | Height [mAU] | Area %  |
|--------|---------------|------|-------------|--------------|--------------|---------|
| 1      | 11.878        | BV   | 0.5092      | 120.35364    | 3.57120      | 0.4574  |
| 2      | 13.377        | VB   | 0.7559      | 2.61926e4    | 538.12329    | 99.5426 |

### 3f

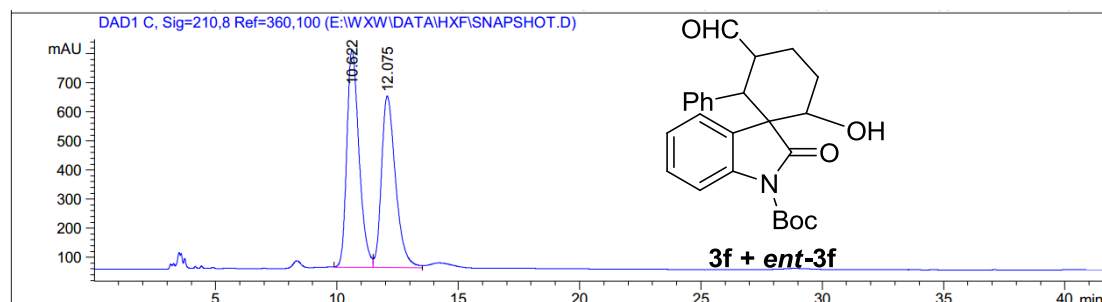

| Peak # | RetTime [min] | Type | Width [min] | Area [mAU*s] | Height [mAU] | Area %  |
|--------|---------------|------|-------------|--------------|--------------|---------|
| 1      | 10.622        | BV   | 0.5387      | 2.61622e4    | 746.88885    | 52.2609 |
| 2      | 12.075        | VB   | 0.6191      | 2.38986e4    | 589.39148    | 47.7391 |

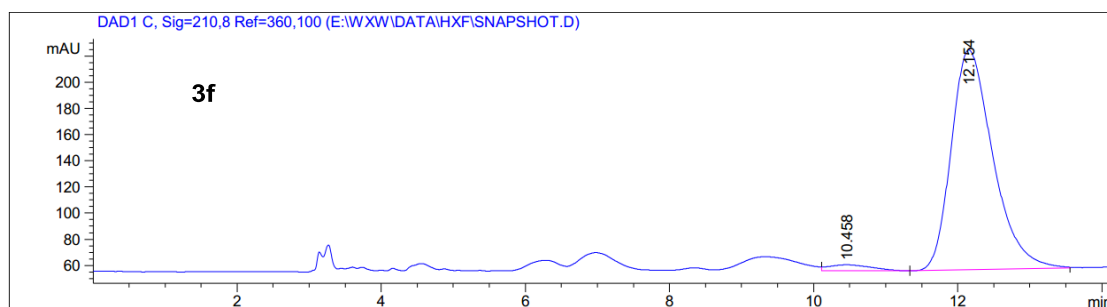



| Peak # | RetTime [min] | Type | Width [min] | Area [mAU*s] | Height [mAU] | Area %  |
|--------|---------------|------|-------------|--------------|--------------|---------|
| 1      | 10.458        | VV   | 0.5472      | 192.17303    | 4.65919      | 2.7744  |
| 2      | 12.154        | VB   | 0.6114      | 6734.51367   | 168.11377    | 97.2256 |

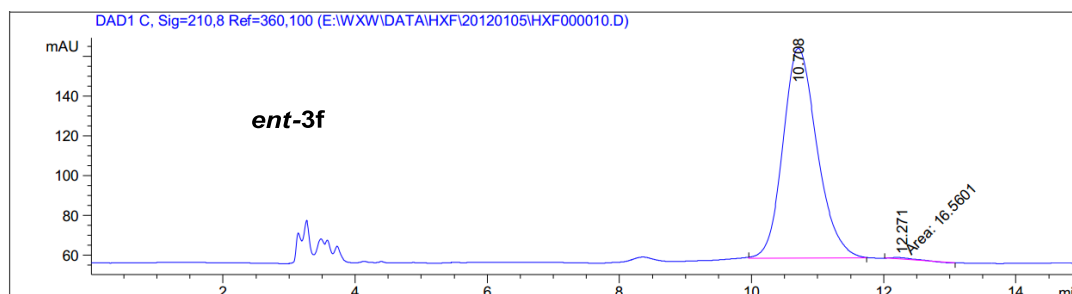

| Peak # | RetTime [min] | Type | Width [min] | Area [mAU*s] | Height [mAU] | Area %  |
|--------|---------------|------|-------------|--------------|--------------|---------|
| 1      | 10.708        | BB   | 0.5528      | 3790.00781   | 105.59081    | 99.5650 |
| 2      | 12.271        | MM   | 0.3978      | 16.56010     | 6.93757e-1   | 0.4350  |

### 3g

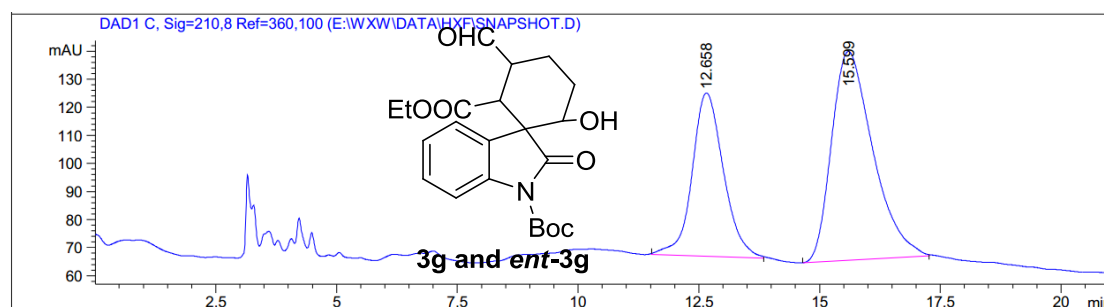

| Peak # | RetTime [min] | Type | Width [min] | Area [mAU*s] | Height [mAU] | Area %  |
|--------|---------------|------|-------------|--------------|--------------|---------|
| 1      | 12.658        | BB   | 0.6927      | 2627.01001   | 58.18851     | 37.2520 |
| 2      | 15.599        | BB   | 0.9199      | 4424.98584   | 74.39378     | 62.7480 |

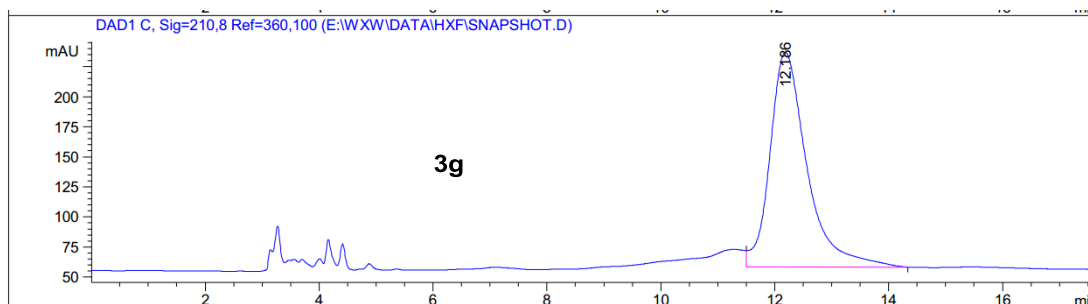

| Peak # | RetTime [min] | Type | Width [min] | Area [mAU*s] | Height [mAU] | Area %   |
|--------|---------------|------|-------------|--------------|--------------|----------|
| 1      | 12.186        | VB   | 0.6757      | 8066.46826   | 178.33591    | 100.0000 |

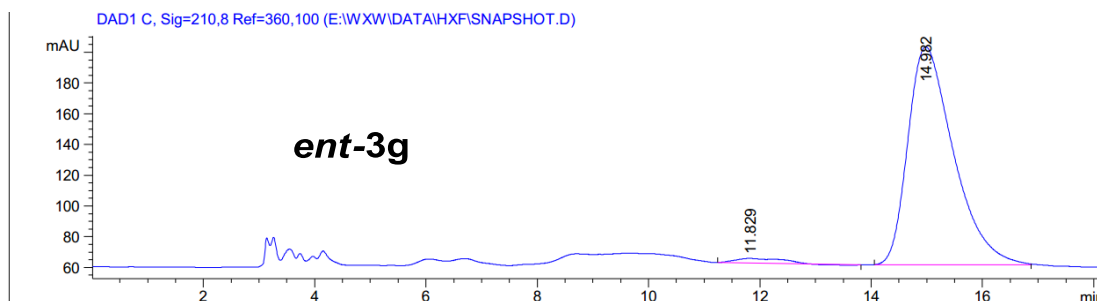

| Peak # | RetTime [min] | Type | Width [min] | Area [mAU*s] | Height [mAU] | Area %  |
|--------|---------------|------|-------------|--------------|--------------|---------|
| 1      | 11.829        | BB   | 0.6971      | 177.92854    | 3.05675      | 2.1553  |
| 2      | 14.982        | BB   | 0.8607      | 8077.53955   | 141.78291    | 97.8447 |

### 3h

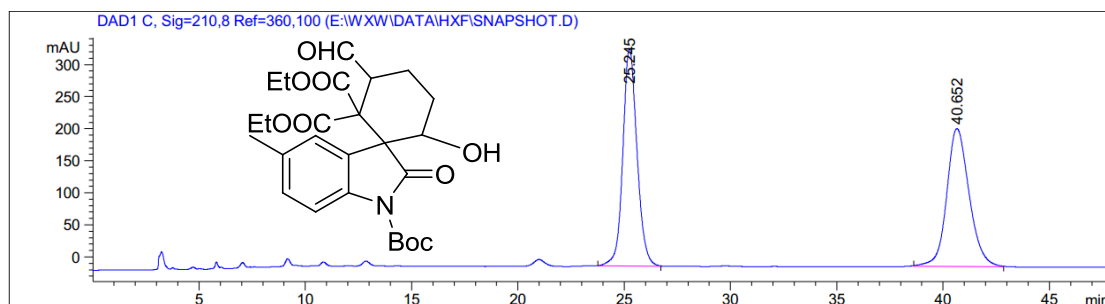

| Peak # | RetTime [min] | Type | Width [min] | Area [mAU*s] | Height [mAU] | Area %  |
|--------|---------------|------|-------------|--------------|--------------|---------|
| 1      | 25.245        | BB   | 0.7076      | 1.57442e4    | 339.14178    | 50.0612 |
| 2      | 40.652        | BB   | 1.1193      | 1.57056e4    | 214.72945    | 49.9388 |

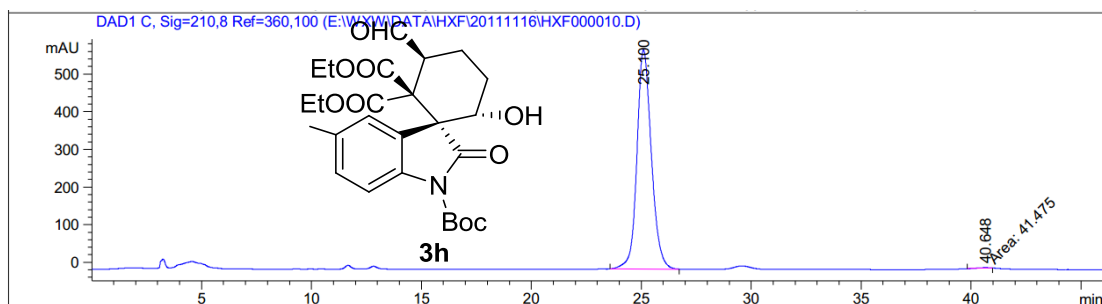

| Peak # | RetTime [min] | Type | Width [min] | Area [mAU*s] | Height [mAU] | Area %  |
|--------|---------------|------|-------------|--------------|--------------|---------|
| 1      | 25.100        | BB   | 0.6989      | 2.66019e4    | 582.35895    | 99.8443 |
| 2      | 40.648        | MM   | 0.5252      | 41.47498     | 1.31624      | 0.1557  |

3i

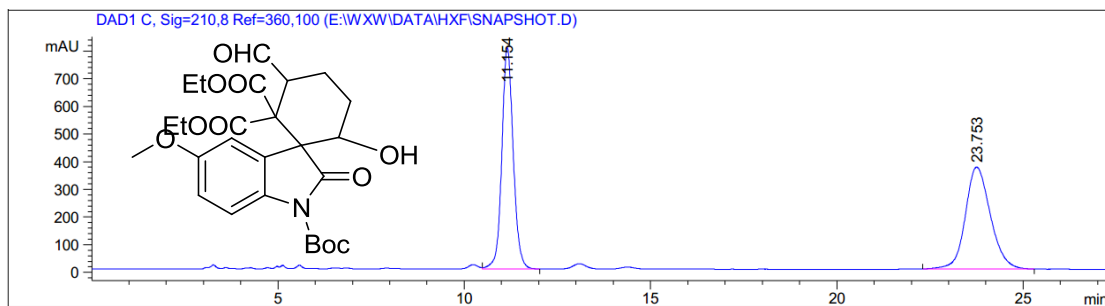

| Peak # | RetTime [min] | Type | Width [min] | Area [mAU*s] | Height [mAU] | Area %  |
|--------|---------------|------|-------------|--------------|--------------|---------|
| 1      | 11.154        | VB   | 0.3265      | 1.70449e4    | 800.29761    | 49.6351 |
| 2      | 23.753        | BB   | 0.7164      | 1.72955e4    | 369.27396    | 50.3649 |

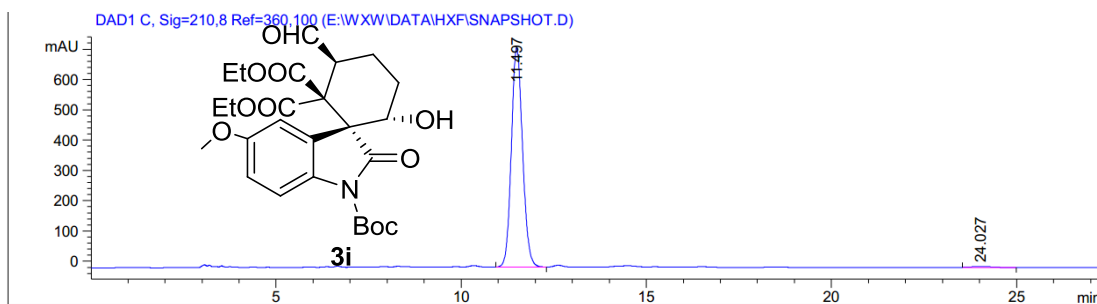

| Peak # | RetTime [min] | Type | Width [min] | Area [mAU*s] | Height [mAU] | Area %  |
|--------|---------------|------|-------------|--------------|--------------|---------|
| 1      | 11.497        | BB   | 0.3281      | 1.52769e4    | 724.29523    | 99.2223 |
| 2      | 24.027        | BB   | 0.5109      | 119.74255    | 2.96685      | 0.7777  |

3j

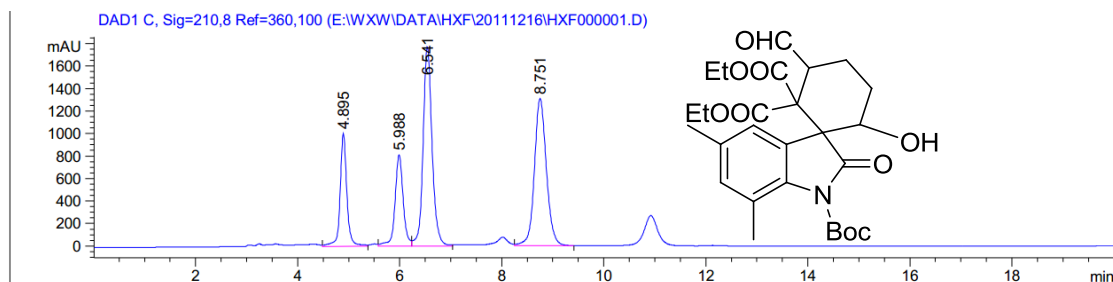

| Peak # | RetTime [min] | Type | Width [min] | Area [mAU*s] | Height [mAU] | Area %  |
|--------|---------------|------|-------------|--------------|--------------|---------|
| 1      | 4.895         | VV   | 0.1378      | 9283.92969   | 1005.08075   | 15.0949 |
| 2      | 5.988         | VV   | 0.1681      | 9079.99707   | 814.29578    | 14.7633 |
| 3      | 6.541         | VV   | 0.1872      | 2.17490e4    | 1772.05310   | 35.3620 |
| 4      | 8.751         | VB   | 0.2490      | 2.13909e4    | 1306.84595   | 34.7798 |

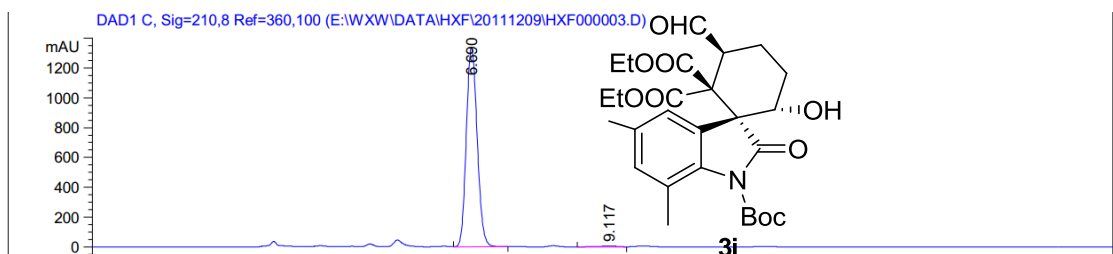

| Peak # | RetTime [min] | Type | Width [min] | Area [mAU*s] | Height [mAU] | Area %  |
|--------|---------------|------|-------------|--------------|--------------|---------|
| 1      | 6.690         | VB   | 0.2094      | 1.78274e4    | 1338.71057   | 99.1635 |
| 2      | 9.117         | BV   | 0.3224      | 150.38289    | 6.84290      | 0.8365  |

3k

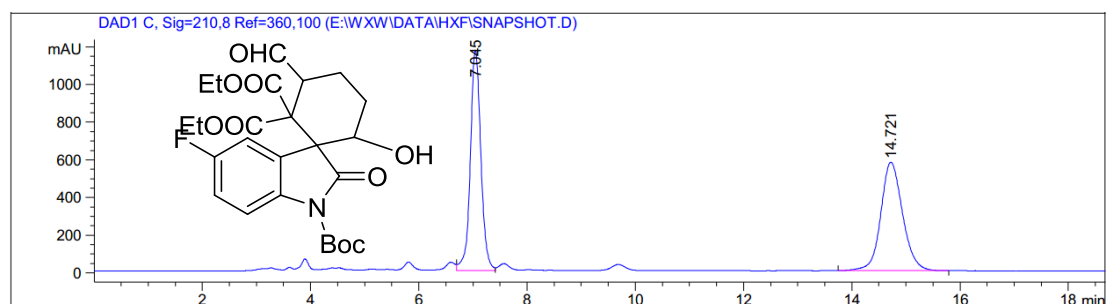

| Peak # | RetTime [min] | Type | Width [min] | Area [mAU*s] | Height [mAU] | Area %  |
|--------|---------------|------|-------------|--------------|--------------|---------|
| 1      | 7.045         | VV   | 0.2078      | 1.58133e4    | 1169.11597   | 49.4810 |
| 2      | 14.721        | BB   | 0.4289      | 1.61450e4    | 576.13135    | 50.5190 |

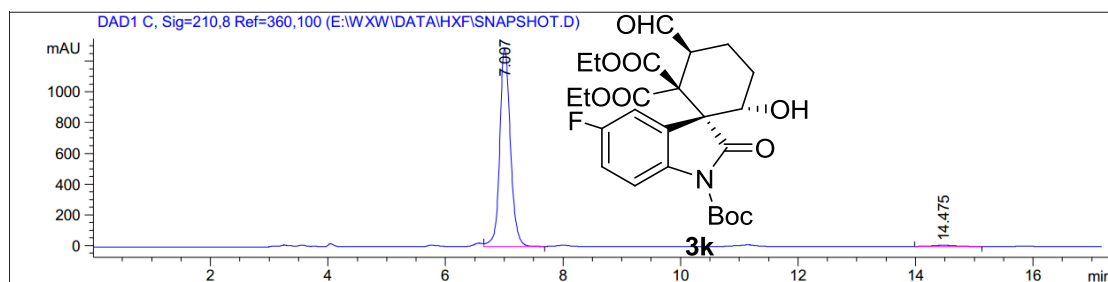

| Peak # | RetTime [min] | Type | Width [min] | Area [mAU*s] | Height [mAU] | Area %  |
|--------|---------------|------|-------------|--------------|--------------|---------|
| 1      | 7.007         | VB   | 0.1933      | 1.62991e4    | 1291.17505   | 98.7995 |
| 2      | 14.475        | BB   | 0.4028      | 198.04033    | 7.58100      | 1.2005  |

3l

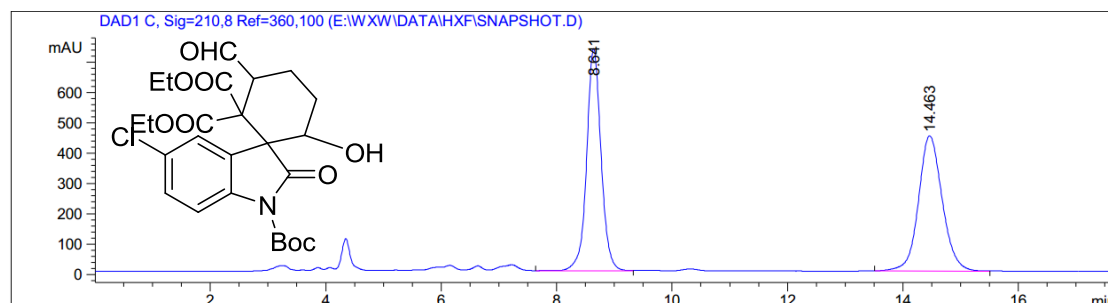

| Peak # | RetTime [min] | Type | Width [min] | Area [mAU*s] | Height [mAU] | Area %  |
|--------|---------------|------|-------------|--------------|--------------|---------|
| 1      | 8.641         | VB   | 0.2646      | 1.27211e4    | 732.40637    | 49.9377 |
| 2      | 14.463        | BB   | 0.4374      | 1.27528e4    | 446.23685    | 50.0623 |

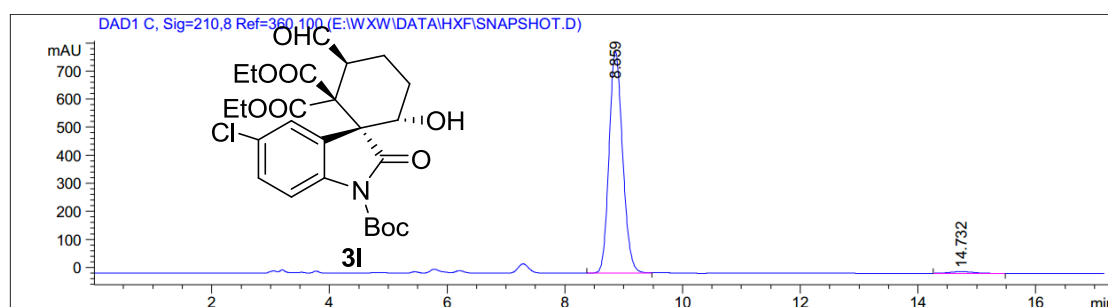

| Peak # | RetTime [min] | Type | Width [min] | Area [mAU*s] | Height [mAU] | Area %  |
|--------|---------------|------|-------------|--------------|--------------|---------|
| 1      | 8.859         | BB   | 0.2511      | 1.26676e4    | 789.79559    | 98.7227 |
| 2      | 14.732        | BB   | 0.4292      | 163.89111    | 6.02865      | 1.2773  |

**3m**

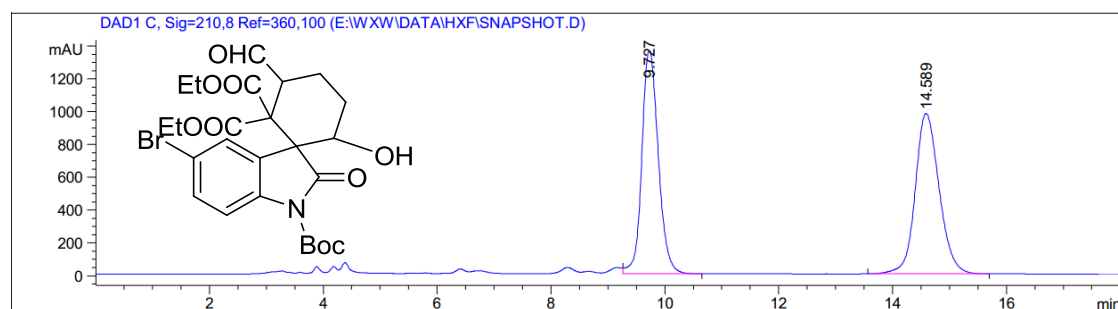

| Peak # | RetTime [min] | Type | Width [min] | Area [mAU*s] | Height [mAU] | Area %  |
|--------|---------------|------|-------------|--------------|--------------|---------|
| 1      | 9.727         | VB   | 0.3108      | 2.73570e4    | 1359.05933   | 48.9174 |
| 2      | 14.589        | BB   | 0.4485      | 2.85679e4    | 978.80011    | 51.0826 |

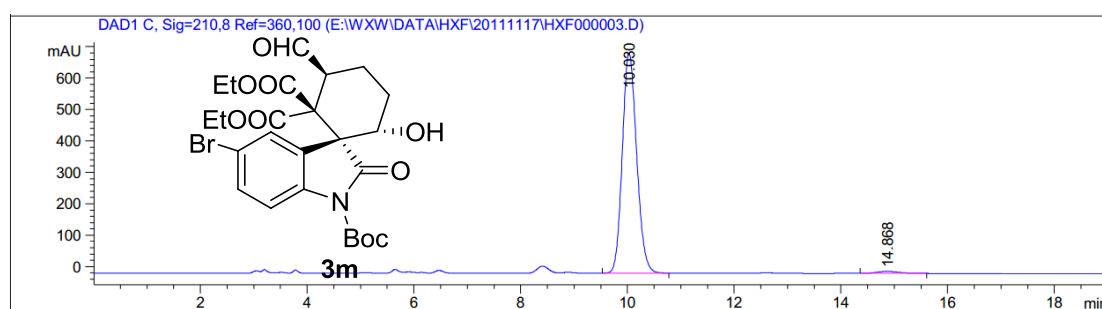

| Peak # | RetTime [min] | Type | Width [min] | Area [mAU*s] | Height [mAU] | Area %  |
|--------|---------------|------|-------------|--------------|--------------|---------|
| 1      | 10.030        | BB   | 0.2900      | 1.30994e4    | 700.88501    | 98.5678 |
| 2      | 14.868        | BB   | 0.4467      | 190.32898    | 6.59554      | 1.4322  |

**3n**

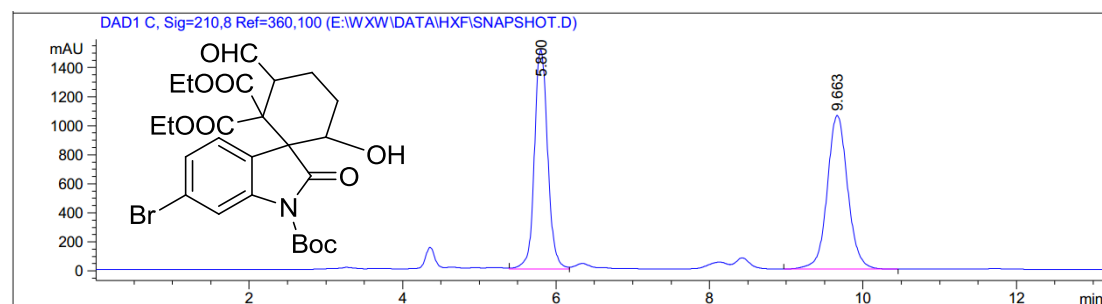

| Peak # | RetTime [min] | Type | Width [min] | Area [mAU*s] | Height [mAU] | Area %  |
|--------|---------------|------|-------------|--------------|--------------|---------|
| 1      | 5.800         | VV   | 0.1863      | 1.81166e4    | 1506.96082   | 47.9834 |
| 2      | 9.663         | BB   | 0.2865      | 1.96394e4    | 1058.25818   | 52.0166 |

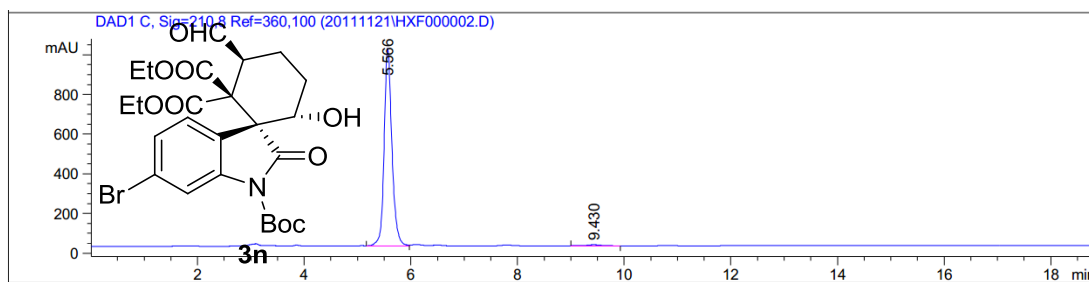

| Peak # | RetTime [min] | Type | Width [min] | Area [mAU*s] | Height [mAU] | Area %  |
|--------|---------------|------|-------------|--------------|--------------|---------|
| 1      | 5.566         | VV   | 0.1522      | 1.00847e4    | 995.55975    | 98.9632 |
| 2      | 9.430         | BB   | 0.2936      | 105.65321    | 5.27757      | 1.0368  |

**3o**

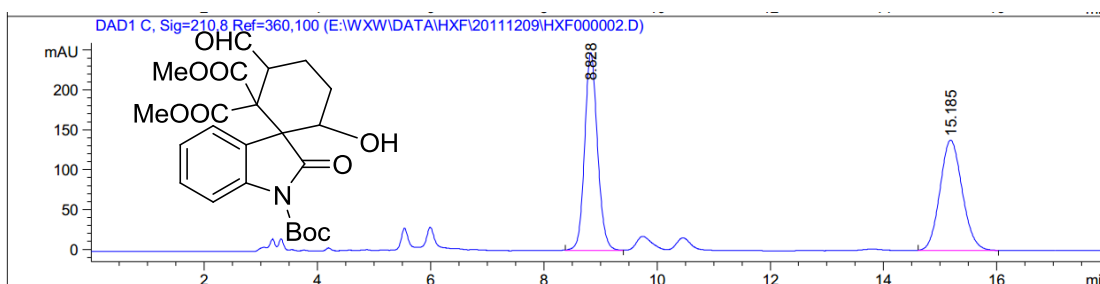

| Peak # | RetTime [min] | Type | Width [min] | Area [mAU*s] | Height [mAU] | Area %  |
|--------|---------------|------|-------------|--------------|--------------|---------|
| 1      | 8.828         | BB   | 0.2420      | 3912.85864   | 248.11314    | 50.7837 |
| 2      | 15.185        | BB   | 0.4252      | 3792.09033   | 138.59007    | 49.2163 |

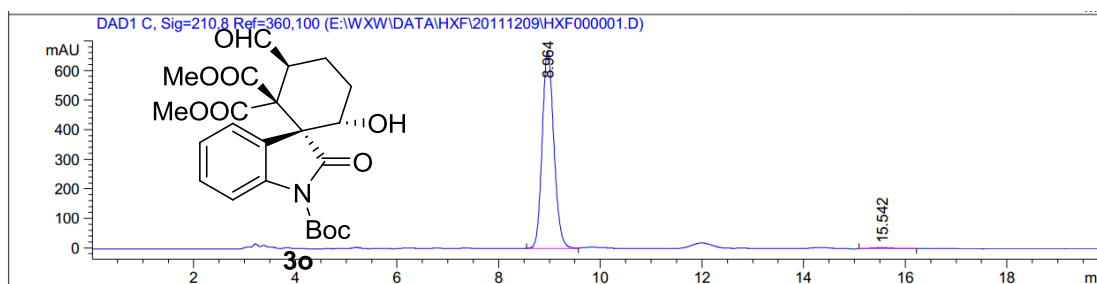

| Peak # | RetTime [min] | Type | Width [min] | Area [mAU*s] | Height [mAU] | Area %  |
|--------|---------------|------|-------------|--------------|--------------|---------|
| 1      | 8.964         | BB   | 0.2475      | 1.06418e4    | 669.15753    | 99.1276 |
| 2      | 15.542        | BB   | 0.3956      | 93.65540     | 3.52902      | 0.8724  |

3p

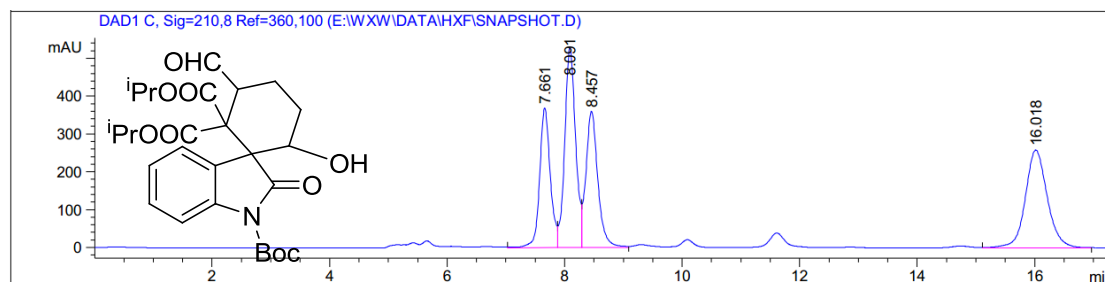

| Peak # | RetTime [min] | Type | Width [min] | Area [mAU*s] | Height [mAU] | Area %  |
|--------|---------------|------|-------------|--------------|--------------|---------|
| 1      | 7.661         | VV   | 0.1894      | 4663.69531   | 369.09717    | 20.0643 |
| 2      | 8.091         | VV   | 0.1952      | 6767.93213   | 529.05225    | 29.1172 |
| 3      | 8.457         | VV   | 0.2112      | 5110.42822   | 360.82385    | 21.9863 |
| 4      | 16.018        | VB   | 0.3945      | 6701.67236   | 258.45273    | 28.8322 |

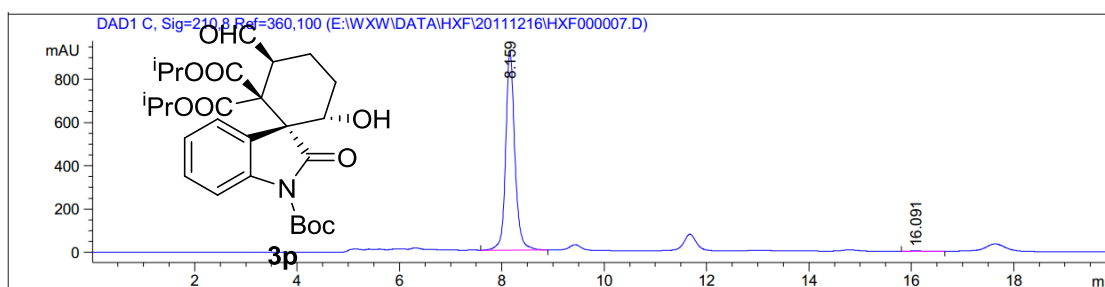

| Peak # | RetTime [min] | Type | Width [min] | Area [mAU*s] | Height [mAU] | Area %  |
|--------|---------------|------|-------------|--------------|--------------|---------|
| 1      | 8.159         | VB   | 0.1882      | 1.13891e4    | 921.46844    | 99.7211 |
| 2      | 16.091        | BB   | 0.3393      | 31.85223     | 1.45576      | 0.2789  |

3q

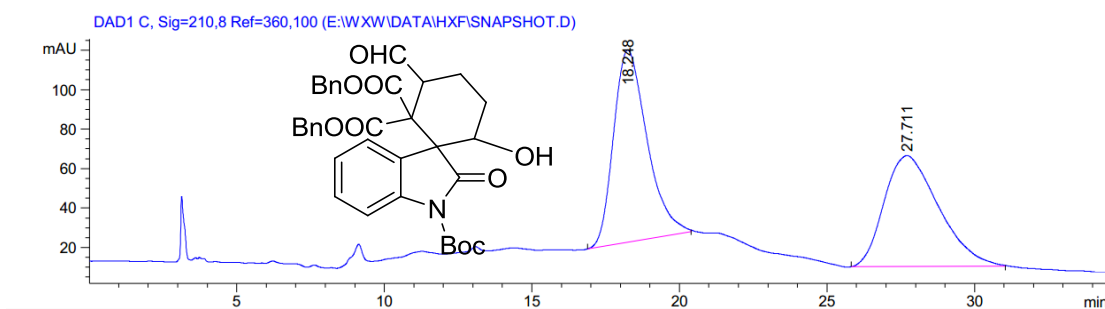

| Peak # | RetTime [min] | Type | Width [min] | Area [mAU*s] | Height [mAU] | Area %  |
|--------|---------------|------|-------------|--------------|--------------|---------|
| 1      | 18.248        | BB   | 1.1839      | 7689.36182   | 97.52584     | 51.5879 |
| 2      | 27.711        | BB   | 1.6611      | 7216.00342   | 56.23308     | 48.4121 |



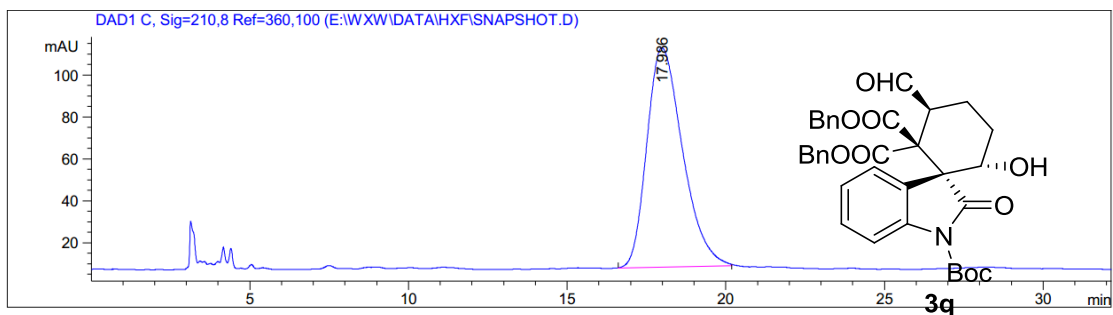

| Peak # | RetTime [min] | Type | Width [min] | Area [mAU*s] | Height [mAU] | Area %   |
|--------|---------------|------|-------------|--------------|--------------|----------|
| 1      | 17.986        | BB   | 1.1824      | 8200.32422   | 104.62435    | 100.0000 |

**3r**

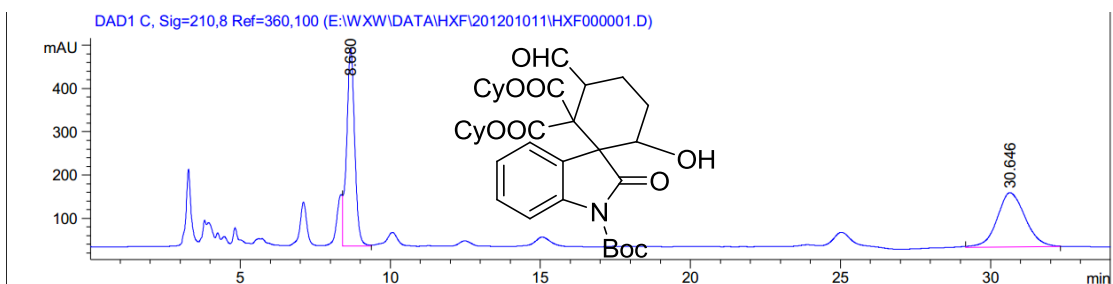

| Peak # | RetTime [min] | Type | Width [min] | Area [mAU*s] | Height [mAU] | Area %  |
|--------|---------------|------|-------------|--------------|--------------|---------|
| 1      | 8.680         | VB   | 0.2841      | 8543.01660   | 457.03152    | 51.2849 |
| 2      | 30.646        | BB   | 0.9998      | 8114.93750   | 125.26167    | 48.7151 |

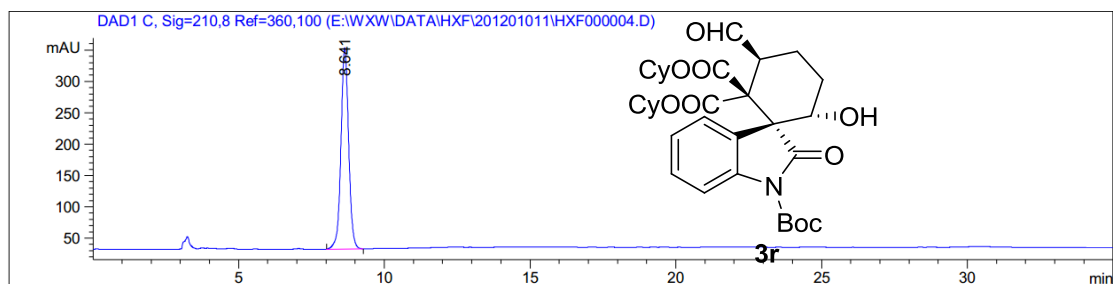

| Peak # | RetTime [min] | Type | Width [min] | Area [mAU*s] | Height [mAU] | Area %   |
|--------|---------------|------|-------------|--------------|--------------|----------|
| 1      | 8.641         | BB   | 0.2796      | 5876.50635   | 320.97714    | 100.0000 |

4

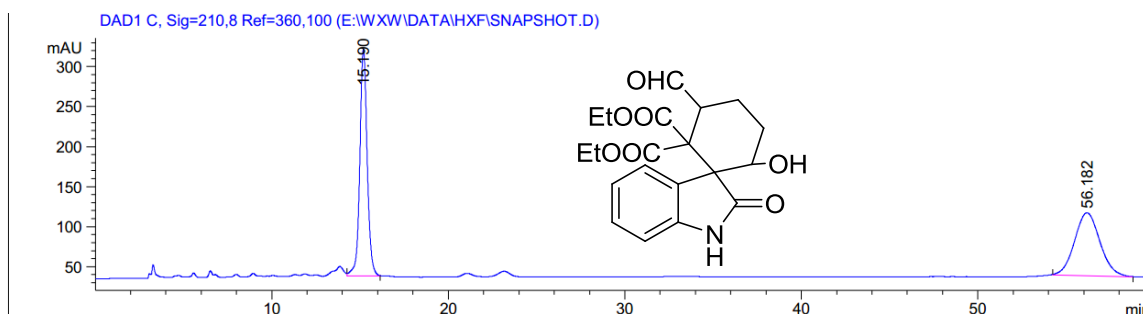

| Peak # | RetTime [min] | Type | Width [min] | Area [mAU*s] | Height [mAU] | Area %  |
|--------|---------------|------|-------------|--------------|--------------|---------|
| 1      | 15.190        | VB   | 0.4443      | 8262.58887   | 283.28412    | 51.1813 |
| 2      | 56.182        | BB   | 1.5134      | 7881.17725   | 78.76503     | 48.8187 |

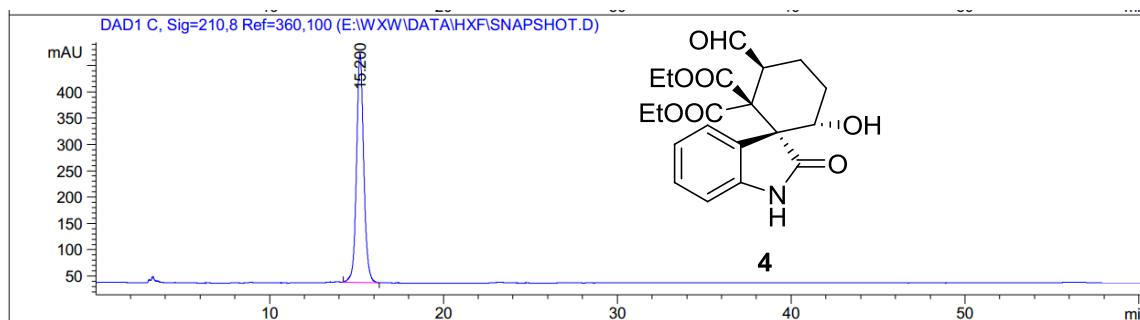

| Peak # | RetTime [min] | Type | Width [min] | Area [mAU*s] | Height [mAU] | Area %   |
|--------|---------------|------|-------------|--------------|--------------|----------|
| 1      | 15.200        | BB   | 0.4414      | 1.25689e4    | 434.59906    | 100.0000 |

5

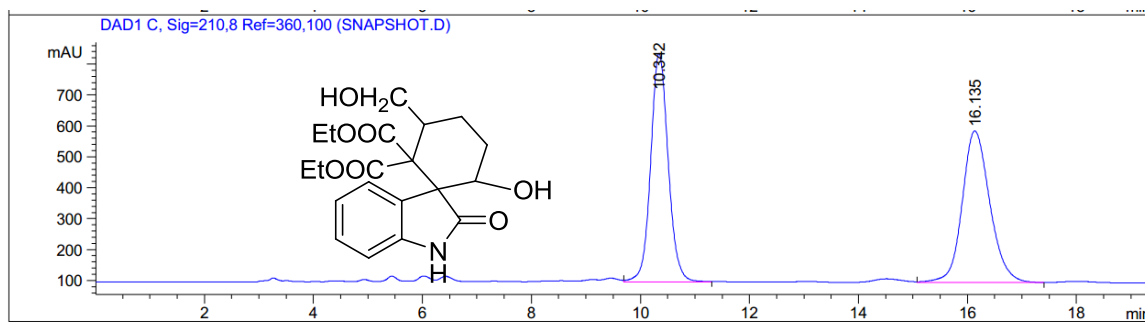

| Peak # | RetTime [min] | Type | Width [min] | Area [mAU*s] | Height [mAU] | Area %  |
|--------|---------------|------|-------------|--------------|--------------|---------|
| 1      | 10.342        | VB   | 0.3447      | 1.65049e4    | 738.57568    | 48.8030 |
| 2      | 16.135        | VB   | 0.5418      | 1.73146e4    | 490.53610    | 51.1970 |

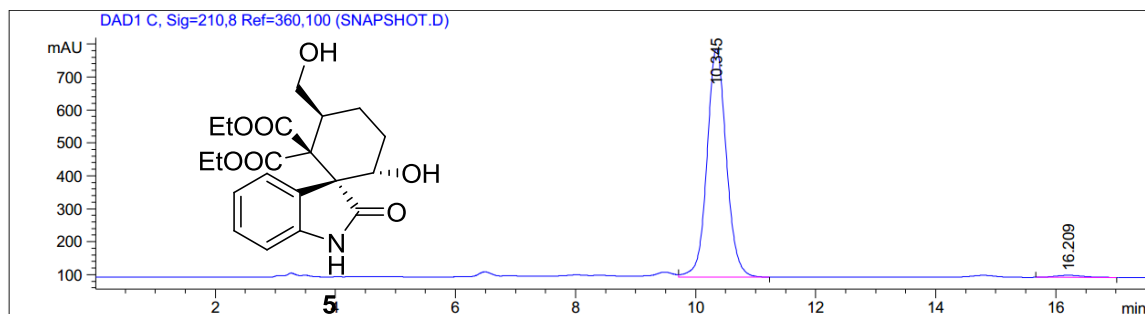

| Peak # | RetTime [min] | Type | Width [min] | Area [mAU*s] | Height [mAU] | Area %  |
|--------|---------------|------|-------------|--------------|--------------|---------|
| 1      | 10.345        | VB   | 0.3433      | 1.55191e4    | 693.02985    | 98.7066 |
| 2      | 16.209        | BB   | 0.4912      | 203.35672    | 6.28997      | 1.2934  |
